# Supplementary material for: A resorcinarene-based tetrabenzoimidazolylidene complex of rhodium
Source: Royal Society of Chemistry journal article supplement (doi:10.1039/d0dt00060d), 2020-01-01
Supplement: d0dt00060d1.pdf [file d0dt00060d1.pdf]

## Supporting Information:

### S1. Additional conformations studies

### S2. Nuclear magnetic resonance

- $^1\text{H}$  NMR spectrum of **1**
- $^{13}\text{C}$  { $^1\text{H}$ }
- NMR spectrum of **1**
- COSY NMR spectrum of **1**
- VT  $^1\text{H}$ NMR Spectra of **1**

### S3. ESI mass spectrometry (Q-Tof)

- HRMS of compound **1**

### S4. Cartesian Coordinates of **1**

---

---

## S1. Additional conformational studies

In addition of the conformations presented in the main text, additional conformation for the cavitant **1** were also optimized. They are shown in Figure S1. The difference between conformation in *vase\_2* and *vase\_5* is a subtle movement of the relative position of the metal complexes.

*Vase\_2* (1.3 kcal/mol)

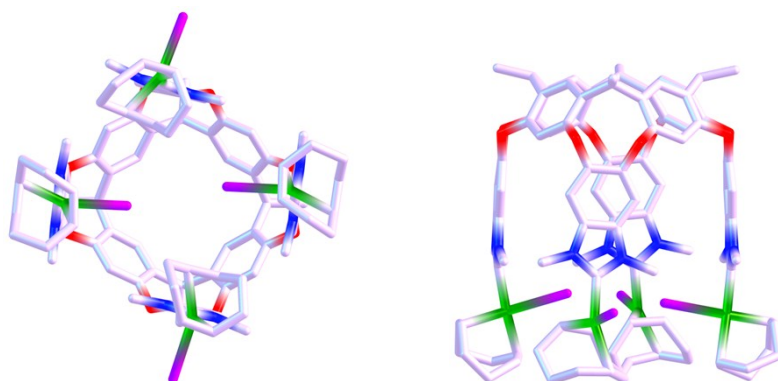

*Vase\_5* (4.0 kcal/mol)

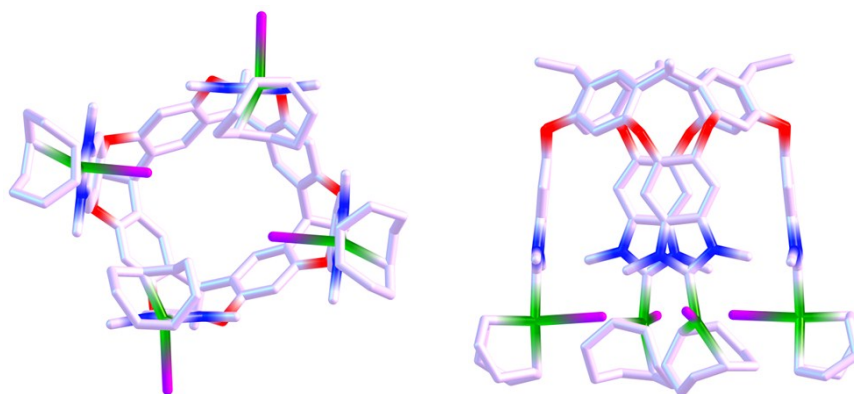

**Figure S1.** Top and side views of additional conformations optimized with rotation of the NHC-Rh bond. In parenthesis relative energies over *vase\_1* conformation.

## S2. Nuclear magnetic resonance Spectra of 1

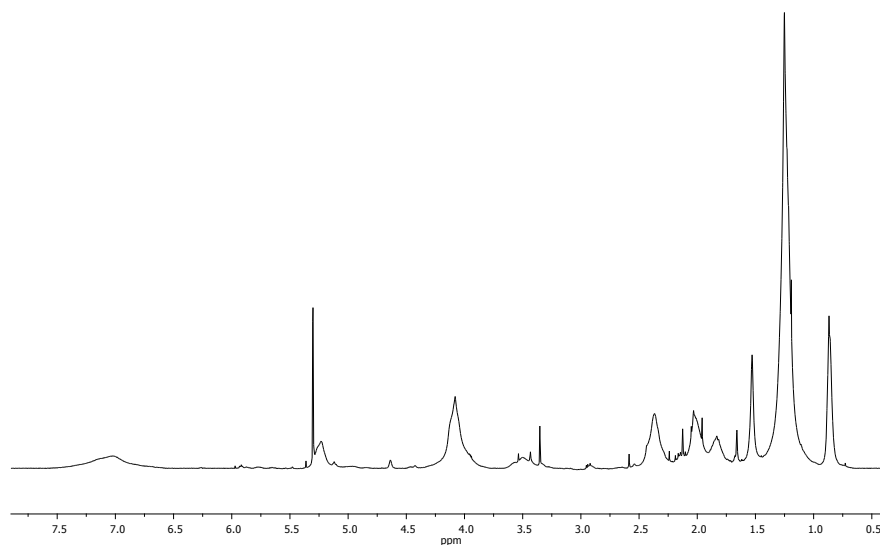

**Figure S2.**  $^1\text{H}$  NMR (500 MHz,  $\text{CD}_2\text{Cl}_2$ ):  $\delta$  7.5-6.7 ( $\text{CH}_{\text{aromatic}}$ ), 5.96 ( $\text{CH}$ ), 5.17 ( $\text{CH}_{\text{COD}}$ ), 4.0 ( $\text{CH}_3$ ), 3.5-3.35 ( $\text{CH}_2$ ), 2.41 ( $\text{CH}_{2,\text{COD}}$ ), 2.08 ( $\text{CH}_{2,\text{COD}}$ ), 2.42-1.00 ( $\text{CH}_2$ ), 0.88 ( $\text{CH}_3$ ).

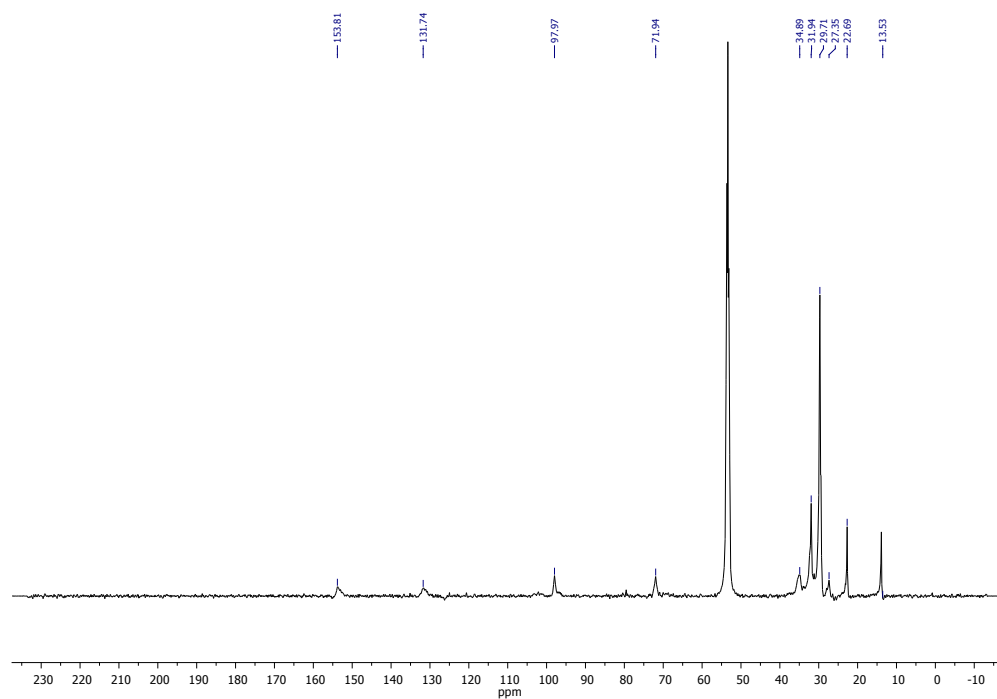

**Figure S3.**  $^{13}\text{C}$  NMR (126 MHz,  $\text{CD}_2\text{Cl}_2$ )  $\delta$  153.8, 131.7, 98.0, 71.9, 34.9, 31.9, 29.7, 27.4, 22.7, 13.5.

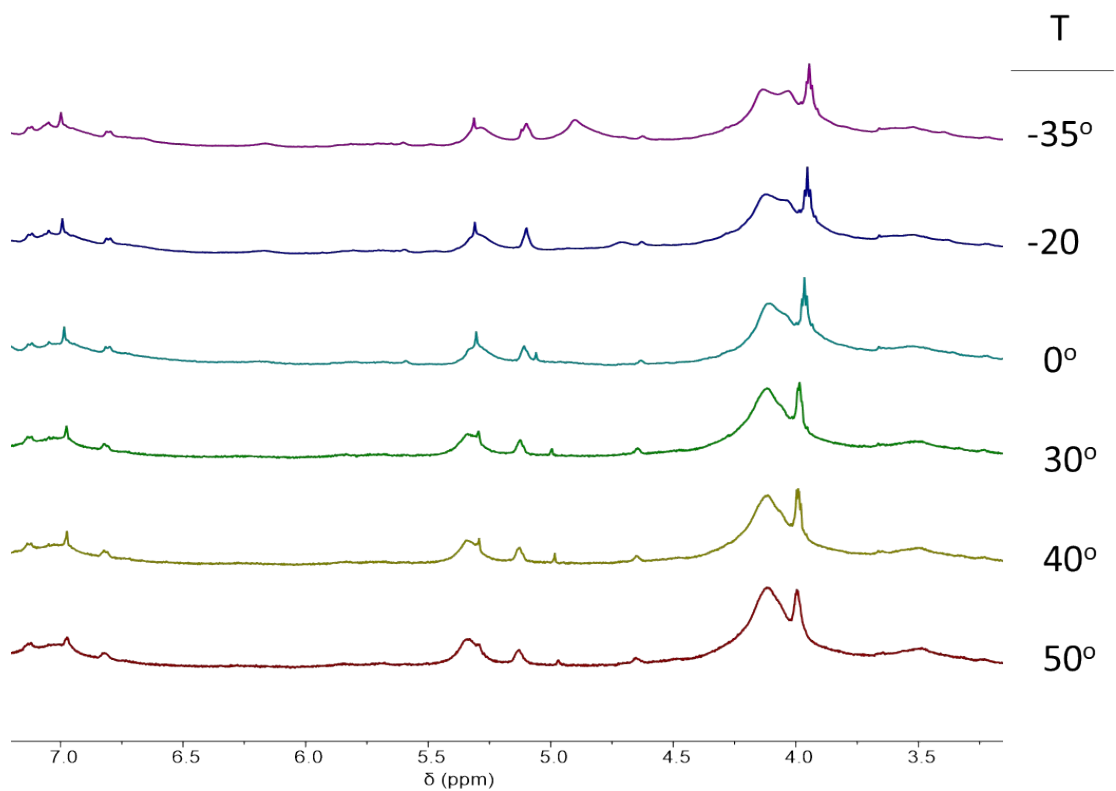

**Figure S4.** VT  $^1\text{H}$  NMR spectrum of **1** ( $\text{CD}_2\text{Cl}_2$ )

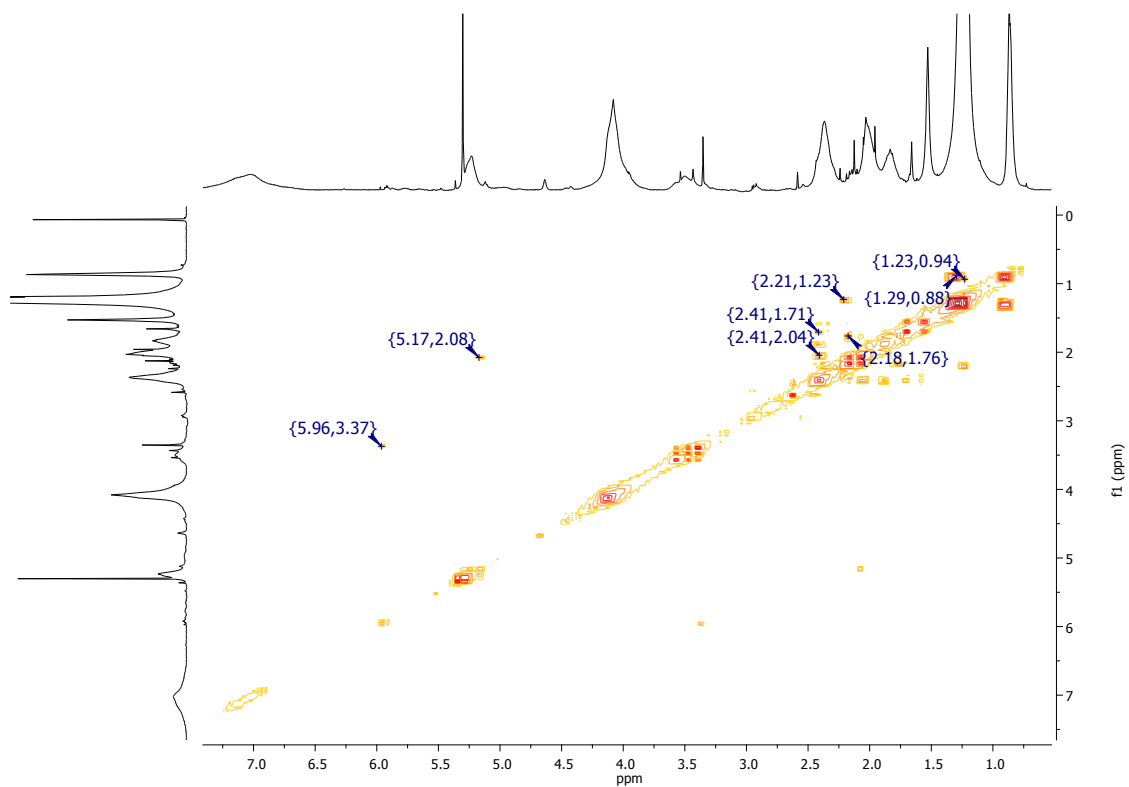

**Figure S5.** COSY NMR spectrum of **1** ( $\text{CD}_2\text{Cl}_2$ )

### S3. ESI mass spectrometry

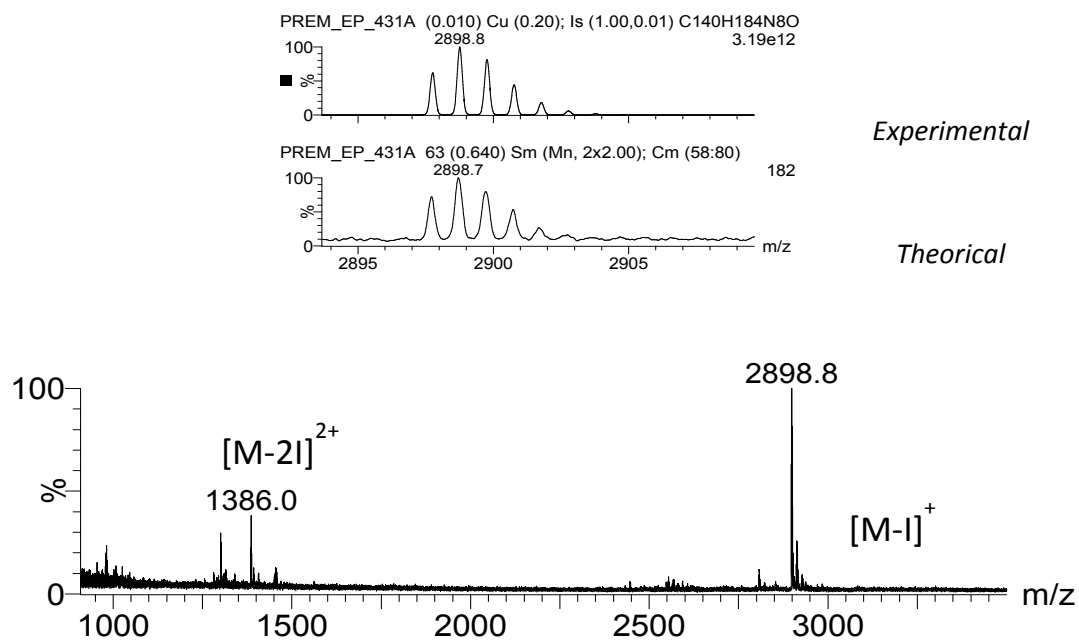

Figure S6. Time-Of-Flight Mass Spectrum (TOF-MS) of **1**

## S4. Cartesian Coordinates of A1 and A2 (1 conformational forms)

### Vase\_1

|     |                  |               |               |
|-----|------------------|---------------|---------------|
| E = | -1324,4269090621 |               |               |
| C   | 11.2119265301    | 13.1651665111 | 20.5412309861 |
| C   | 10.9909333559    | 12.0573981753 | 19.7100685095 |
| C   | 11.7799102698    | 10.8898824363 | 19.6888134987 |
| C   | 12.3226399564    | 13.0777148703 | 21.3975700249 |
| C   | 13.0571444727    | 11.8962695426 | 21.4983192238 |
| C   | 12.8019286906    | 10.8142324900 | 20.6499987501 |
| C   | 10.2205274811    | 14.3306887146 | 20.5097317489 |
| C   | 10.6478004833    | 15.5198652280 | 19.6445699250 |
| C   | 10.2234955140    | 15.5358285103 | 18.3060494679 |
| C   | 10.4890975669    | 16.5611782786 | 17.3814591228 |
| C   | 10.1213041536    | 16.3022986004 | 15.9214940888 |
| C   | 11.2706988459    | 15.5469823848 | 15.2510325679 |
| C   | 11.0932346980    | 14.2019486721 | 14.9086654025 |
| C   | 12.0630241375    | 13.4075473720 | 14.2778079701 |
| C   | 12.5273518892    | 16.1132522719 | 14.9654073388 |
| C   | 13.5360561012    | 15.3594649163 | 14.3521812176 |
| C   | 13.3011413720    | 14.0219020492 | 14.0005680275 |
| C   | 11.3980841566    | 16.6328690587 | 20.0682181073 |
| C   | 11.5937969955    | 17.7207059726 | 19.2119701519 |
| C   | 11.1593068834    | 17.6853179108 | 17.8837098872 |
| C   | 11.4814369658    | 9.8691881609  | 18.5905726312 |
| C   | 12.3241605946    | 10.1582517938 | 17.3443453861 |
| C   | 11.7058579208    | 11.9449758755 | 13.9935082684 |
| C   | 12.4059168592    | 11.0745736186 | 15.0356785685 |
| C   | 11.7341078565    | 10.7880078336 | 16.2381003055 |
| C   | 13.6892918684    | 9.8408790142  | 17.2261182299 |
| C   | 14.3744257545    | 10.0321153539 | 16.0261262216 |
| C   | 13.7304009771    | 10.6293734841 | 14.9397145593 |
| O   | 11.3804795979    | 18.8227764636 | 17.0805959490 |
| O   | 12.6212387825    | 17.4985861719 | 15.0850791631 |
| C   | 13.4259738871    | 18.2769230489 | 15.8970594642 |
| C   | 12.7209662799    | 19.0918272356 | 16.8269966299 |
| C   | 13.3174728713    | 20.2042494404 | 17.4246582312 |
| C   | 14.6589335374    | 20.4419046888 | 17.1167320731 |
| C   | 15.3975488708    | 19.5562571957 | 16.3086550656 |
| C   | 14.7953280800    | 18.4664750235 | 15.6693621154 |
| O   | 11.9789267108    | 16.6830977022 | 21.3537886746 |
| C   | 13.3301757956    | 16.3074387592 | 21.2972513353 |
| C   | 13.6808113527    | 14.9796972704 | 21.6298204186 |
| C   | 14.9689050340    | 14.4856773495 | 21.3798878692 |
| C   | 14.2890814732    | 17.2087623234 | 20.8160267499 |
| C   | 15.8803442121    | 15.3564869867 | 20.7872250715 |
| C   | 15.5585909528    | 16.7046308392 | 20.5462019883 |
| O   | 12.6902431559    | 14.1699732031 | 22.1929161434 |
| O   | 13.5878453899    | 9.6522344705  | 20.8206223571 |
| C   | 14.9240380104    | 9.8405360414  | 20.4689399722 |
| C   | 15.2690815571    | 9.7651308673  | 19.0951314534 |
| O   | 14.3116867984    | 9.1780518092  | 18.2829247149 |
| C   | 15.8931692036    | 10.0619172066 | 21.4538709304 |
| C   | 17.1971580983    | 10.3072093358 | 21.0131095090 |
| C   | 17.5005909271    | 10.4049695416 | 19.6409917242 |
| C   | 16.5542472917    | 10.1073886543 | 18.6549384259 |
| O   | 14.3984991403    | 10.7105065512 | 13.7109847586 |
| O   | 14.2065239250    | 13.3612661772 | 13.1583570955 |
| C   | 15.4570760369    | 12.8683277807 | 13.5071003289 |
| C   | 15.5621909101    | 11.4657359131 | 13.7003589505 |
| C   | 16.6078663234    | 13.6635222007 | 13.4313400086 |

|    |               |               |               |
|----|---------------|---------------|---------------|
| C  | 17.8438672923 | 13.0157787858 | 13.5321144409 |
| C  | 17.9358896446 | 11.6180623827 | 13.6686569412 |
| C  | 16.7978788131 | 10.8174011196 | 13.7652943318 |
| N  | 19.1573831625 | 13.4812738923 | 13.4461750892 |
| N  | 19.2908079534 | 11.3046903296 | 13.6469455488 |
| C  | 20.0553560800 | 12.4404538169 | 13.5034773571 |
| N  | 16.6976154319 | 20.0656139754 | 16.2670214191 |
| N  | 15.5325628287 | 21.4574373200 | 17.4928119429 |
| C  | 16.7906755261 | 21.2462127531 | 16.9729958733 |
| N  | 16.6520157077 | 17.2560027153 | 19.8871648530 |
| C  | 17.6007629547 | 16.2958850981 | 19.6286877602 |
| N  | 17.1462414418 | 15.1535895419 | 20.2502721597 |
| N  | 18.3937001268 | 10.5191053524 | 21.6939354356 |
| N  | 18.8544418318 | 10.7268053340 | 19.5611249965 |
| C  | 19.4271401560 | 10.7746820109 | 20.8167968191 |
| H  | 10.1273852224 | 13.7435967340 | 15.1313077981 |
| H  | 14.4802550183 | 15.8275925729 | 14.0816274199 |
| H  | 10.6889391273 | 11.0939962181 | 16.3225707697 |
| H  | 15.4011055758 | 9.6890260177  | 15.9222656293 |
| H  | 10.1530156214 | 12.1093562827 | 19.0110733320 |
| H  | 13.8514028420 | 11.8237548226 | 22.2382229957 |
| H  | 9.6694920805  | 14.6666720472 | 17.9439626494 |
| H  | 12.1174350814 | 18.6023302584 | 19.5748497770 |
| H  | 15.3501390841 | 17.8183632194 | 14.9937492724 |
| H  | 12.7379614948 | 20.8419608406 | 18.0902467652 |
| H  | 14.0150953473 | 18.2330281733 | 20.5758027789 |
| H  | 15.2167578716 | 13.4446435885 | 21.5743308975 |
| H  | 16.5311177108 | 14.7355505152 | 13.2639003472 |
| H  | 16.8408540875 | 9.7330426528  | 13.8518757968 |
| H  | 16.8126273472 | 10.0952347706 | 17.5980124718 |
| H  | 15.6179277841 | 10.0454849247 | 22.5074185184 |
| C  | 9.5737102264  | 17.4933267720 | 15.1088653886 |
| H  | 9.3000779038  | 15.5679996781 | 15.9705919228 |
| H  | 10.3321126522 | 18.2588390887 | 14.9228378122 |
| H  | 8.7364222443  | 17.9636068883 | 15.6454853450 |
| H  | 9.1996464560  | 17.1316118915 | 14.1396233615 |
| C  | 9.6944649310  | 14.7268377765 | 21.9063395657 |
| H  | 10.4813534294 | 15.1511010169 | 22.5380909769 |
| H  | 9.2780573371  | 13.8430816289 | 22.4116138662 |
| H  | 8.8930013951  | 15.4731257185 | 21.8030212903 |
| H  | 9.3524941125  | 13.9182781076 | 19.9690471636 |
| C  | 11.8184073818 | 11.5166681234 | 12.5163841195 |
| H  | 12.8267365602 | 11.6497889606 | 12.1154988257 |
| H  | 11.1225524607 | 12.1163890233 | 11.9109211684 |
| H  | 11.5411422837 | 10.4576135487 | 12.4084499964 |
| H  | 10.6353766139 | 11.8699593701 | 14.2464122213 |
| H  | 10.4489791071 | 10.0973982830 | 18.2780115864 |
| C  | 11.4739598838 | 8.3891575267  | 19.0250776428 |
| H  | 11.1199695828 | 7.7614485910  | 18.1940847356 |
| H  | 12.4646867686 | 8.0385066279  | 19.3285872852 |
| H  | 10.7869233136 | 8.2539118466  | 19.8736089076 |
| Rh | 18.3351710715 | 22.5166677940 | 17.0982671133 |
| I  | 18.7245189687 | 21.7926100533 | 19.6832862654 |
| C  | 19.4578193319 | 24.3931941833 | 17.5162046616 |
| H  | 19.5051613045 | 24.4275552279 | 18.6080663518 |
| C  | 20.3320708247 | 23.5154061439 | 16.8748707869 |
| H  | 20.9675127515 | 22.9000237373 | 17.5187665687 |
| C  | 17.6218973678 | 23.6898118244 | 15.4507597965 |
| H  | 16.5404344651 | 23.5445661989 | 15.3710408257 |
| C  | 18.4314540823 | 22.6212835141 | 14.9663806448 |
| H  | 17.8911515458 | 21.7787297503 | 14.5235051366 |

|    |                |               |               |
|----|----------------|---------------|---------------|
| C  | 19.8680021165  | 22.7278516301 | 14.4968601633 |
| C  | 18.0660258094  | 25.1494496846 | 15.5057148884 |
| C  | 20.7417186387  | 23.6162534225 | 15.4137102008 |
| C  | 18.6895258031  | 25.5262420885 | 16.8705132024 |
| H  | 17.88444618991 | 25.8115832443 | 17.5657874200 |
| H  | 19.3341121571  | 26.4192776869 | 16.7698690728 |
| H  | 18.7747279888  | 25.3466295527 | 14.6881793188 |
| H  | 17.1979050886  | 25.7987448235 | 15.3138238788 |
| H  | 20.2848777381  | 21.7075422511 | 14.4851436265 |
| H  | 19.9117404596  | 23.0857316085 | 13.4510321324 |
| H  | 21.7965787056  | 23.3160718034 | 15.3152117656 |
| H  | 20.6951002459  | 24.6658523639 | 15.0896618996 |
| Rh | 19.1208074000  | 16.3608391457 | 18.3303441707 |
| I  | 17.2668739539  | 15.3860090089 | 16.5546127784 |
| C  | 20.1984412824  | 17.8775219861 | 19.3716761503 |
| H  | 19.5112033291  | 18.4219937276 | 20.0291639934 |
| C  | 20.6536192267  | 16.6078329383 | 19.8218800135 |
| H  | 20.2479526697  | 16.2400241431 | 20.7689792027 |
| C  | 20.8172761843  | 15.5330403583 | 17.1875432937 |
| H  | 20.3704199114  | 14.7368207215 | 16.5830118106 |
| C  | 20.6339752114  | 16.8473486239 | 16.7492904694 |
| H  | 20.0283631522  | 16.9831045330 | 15.8487173194 |
| C  | 21.8405197799  | 15.0572947558 | 18.1950480779 |
| C  | 21.9842803537  | 15.9870434419 | 19.4188814326 |
| C  | 21.4953131287  | 18.0298391776 | 17.1645565608 |
| C  | 20.9253838242  | 18.7778465089 | 18.3942048667 |
| H  | 21.5222776807  | 14.0609964921 | 18.5430760808 |
| H  | 22.8127402482  | 14.8942106633 | 17.6950738362 |
| H  | 22.7212634004  | 16.7809089652 | 19.2275040581 |
| H  | 22.3649492972  | 15.3970693834 | 20.2674271435 |
| H  | 21.5726159056  | 18.7339139557 | 16.3209249239 |
| H  | 22.5199763751  | 17.6831705270 | 17.3626670441 |
| H  | 20.2109223267  | 19.5492861474 | 18.0646345530 |
| H  | 21.7245967220  | 19.3341659770 | 18.9197954635 |
| Rh | 21.3602521453  | 11.0170375524 | 21.2786472362 |
| I  | 20.8018490826  | 13.4849608896 | 22.2581896634 |
| C  | 21.8712670598  | 9.3662008311  | 20.0152443811 |
| H  | 21.0344631360  | 9.1349354326  | 19.3485379417 |
| C  | 21.7441614799  | 8.9084787048  | 21.3586316072 |
| H  | 20.8078815982  | 8.4021937059  | 21.6117718776 |
| C  | 23.5664473875  | 11.3591171147 | 21.1082670539 |
| H  | 23.6014767517  | 12.4182434580 | 20.8345329103 |
| C  | 23.2651139237  | 11.0669282336 | 22.4384511566 |
| H  | 23.1333358115  | 11.9155070539 | 23.1151687509 |
| C  | 22.9323366468  | 8.5380209802  | 22.2436165887 |
| C  | 23.4153328894  | 9.7215877500  | 23.1148926700 |
| C  | 24.2122019042  | 10.3878567560 | 20.1324845950 |
| C  | 23.1718573112  | 9.6199454689  | 19.2825625541 |
| H  | 22.6498160692  | 7.6985136175  | 22.8975859790 |
| H  | 23.7521212608  | 8.1650717449  | 21.6114967557 |
| H  | 22.8192041639  | 9.7528375704  | 24.0404863270 |
| H  | 24.4632381894  | 9.5665721945  | 23.4334237800 |
| H  | 23.5994105455  | 8.6673541720  | 18.9166621179 |
| H  | 22.9387569744  | 10.2088914600 | 18.3796138243 |
| H  | 24.8808811639  | 10.9484953456 | 19.4610225378 |
| H  | 24.8527790664  | 9.6865400888  | 20.6868869642 |
| Rh | 22.0401043012  | 12.5192247227 | 13.2730108325 |
| I  | 22.3338957167  | 12.0362026969 | 15.9185677877 |
| C  | 24.1985606480  | 12.0318430408 | 12.8622466223 |
| H  | 24.4663363426  | 11.4073875088 | 13.7186146979 |
| C  | 24.0635280707  | 13.4001884184 | 13.0970190138 |



|   |               |               |               |
|---|---------------|---------------|---------------|
| H | 24.2646560145 | 13.7477392766 | 14.1156492275 |
| C | 21.8493796063 | 11.8655497649 | 11.2641212708 |
| H | 20.8652836102 | 11.4041005889 | 11.1225232945 |
| C | 21.8794440012 | 13.2921189954 | 11.2721790056 |
| H | 20.9118452493 | 13.7884120589 | 11.1553638808 |
| C | 24.3562780098 | 11.4028528066 | 11.4877086438 |
| C | 22.9998456762 | 10.9499746491 | 10.8953234754 |
| C | 23.0812247492 | 14.1331146816 | 10.8482509616 |
| C | 24.0027768386 | 14.4855526660 | 12.0418098804 |
| H | 23.6453728010 | 13.6050183164 | 10.0651733161 |
| H | 22.7242321929 | 15.0644559958 | 10.3821750230 |
| H | 22.7577192610 | 9.9467987731  | 11.2814053149 |
| H | 23.0713206572 | 10.8435935142 | 9.7961959671  |
| H | 24.8543770844 | 12.1106933810 | 10.8100651327 |
| H | 25.0270431949 | 10.5331966786 | 11.5646292817 |
| H | 23.6241952571 | 15.3975517405 | 12.5291594551 |
| H | 25.0210885691 | 14.7310283237 | 11.6867169727 |
| C | 19.5307544197 | 11.1058809562 | 18.3224286011 |
| H | 18.9791673089 | 11.9175110700 | 17.8239725755 |
| H | 20.5364881035 | 11.4634191695 | 18.5770509343 |
| H | 19.6192917405 | 10.2498961748 | 17.6381362819 |
| C | 19.8220806436 | 9.9539219144  | 13.7634201184 |
| H | 20.9190287174 | 10.0260341124 | 13.7759977556 |
| H | 19.4849345332 | 9.4970004742  | 14.7055721329 |
| H | 19.4922091296 | 9.3369361552  | 12.9144668112 |
| C | 17.8275002481 | 19.3640910995 | 15.6647826919 |
| H | 17.7061101567 | 19.2990800331 | 14.5734004458 |
| H | 18.7378615913 | 19.9298835334 | 15.9045228277 |
| H | 17.8999523594 | 18.3486004665 | 16.0879001564 |
| C | 19.5252095516 | 14.8900608618 | 13.3583420470 |
| H | 20.6180110048 | 14.9554736652 | 13.4549569104 |
| H | 19.2106013915 | 15.3095888240 | 12.3913184730 |
| H | 19.0414596342 | 15.4359349289 | 14.1842067987 |
| C | 15.1569337638 | 22.5863593176 | 18.3336765470 |
| H | 14.2951604664 | 23.1098468982 | 17.8954349938 |
| H | 14.9094641957 | 22.2402552416 | 19.3479842092 |
| H | 16.0218707988 | 23.2623832332 | 18.3922315961 |
| C | 16.6813262312 | 18.6209115042 | 19.3891292356 |
| H | 17.5567395512 | 18.7338227944 | 18.7395947219 |
| H | 15.7698014377 | 18.8151928216 | 18.8087137980 |
| H | 16.7627265673 | 19.3439558423 | 20.2119523876 |
| C | 17.7506454225 | 13.8384378444 | 20.0995032329 |
| H | 18.7681433979 | 13.9734828591 | 19.7097156945 |
| H | 17.8200314071 | 13.3430551860 | 21.0767201670 |
| H | 17.1562458813 | 13.2366955026 | 19.3963223204 |
| C | 18.5323008502 | 10.4737525850 | 23.1441709723 |
| H | 18.1838927610 | 9.5032916818  | 23.5259755370 |
| H | 19.5965507358 | 10.6154072013 | 23.3804956265 |
| H | 17.9569158042 | 11.2882334920 | 23.6082886344 |

### Vase\_2

|     |                  |               |               |
|-----|------------------|---------------|---------------|
| E = | -1324,4248870152 |               |               |
| C   | 11.9169756721    | 16.8740502450 | 21.8633389081 |
| C   | 11.3018589405    | 15.8308059637 | 21.1482972315 |
| C   | 11.8873306276    | 14.5817421090 | 20.8907798614 |
| C   | 13.1885725474    | 16.6000949295 | 22.3909011366 |
| C   | 13.8252833982    | 15.3825844642 | 22.1328529506 |
| C   | 13.2003837016    | 14.3997574885 | 21.3610544605 |
| C   | 11.1900915321    | 18.2165948616 | 21.9504016933 |
| C   | 11.7013201618    | 19.1590893591 | 20.8558469815 |
| C   | 10.9728025788    | 19.2478525098 | 19.6588541536 |

|   |               |               |               |
|---|---------------|---------------|---------------|
| C | 11.3246264771 | 20.0469336053 | 18.5565416359 |
| C | 10.4638004373 | 19.9516486253 | 17.2975446401 |
| C | 11.0306452738 | 18.9195419208 | 16.3182678941 |
| C | 10.4372752478 | 17.6479503988 | 16.2705843616 |
| C | 10.8117311050 | 16.6181757744 | 15.3904197999 |
| C | 12.1038440479 | 19.1401949103 | 15.4347858015 |
| C | 12.4708215454 | 18.1659280821 | 14.5016606528 |
| C | 11.8259206733 | 16.9261328517 | 14.4705848833 |
| C | 12.8708804282 | 19.9368776258 | 20.9271050024 |
| C | 13.2316996348 | 20.7839752493 | 19.8777711701 |
| C | 12.4746382198 | 20.8377185812 | 18.7039472298 |
| C | 11.0695452449 | 13.5211331145 | 20.1492337230 |
| C | 11.4692401070 | 13.4418307270 | 18.6759233453 |
| C | 10.1386518878 | 15.2533060459 | 15.5411067418 |
| C | 11.0179637046 | 14.3271618062 | 16.3878840317 |
| C | 10.7447179472 | 14.2262987388 | 17.7611014569 |
| C | 12.5233927643 | 12.6819300896 | 18.1437203676 |
| C | 12.8324317595 | 12.7492044572 | 16.7815424681 |
| C | 12.1107972553 | 13.5766643744 | 15.9187272543 |
| O | 12.8423751627 | 21.7583397524 | 17.7079953918 |
| O | 12.6995554184 | 20.4032218989 | 15.3628928028 |
| C | 13.9673446010 | 20.6579710908 | 15.8784290739 |
| C | 14.0300218839 | 21.4612023093 | 17.0433833058 |
| C | 15.2365772203 | 22.0148836856 | 17.4877492266 |
| C | 16.3899835447 | 21.6823081857 | 16.7787189532 |
| C | 16.3455226870 | 20.8147204549 | 15.6677134332 |
| C | 15.1357716872 | 20.3047337264 | 15.1873005650 |
| O | 13.6260599482 | 19.9635794247 | 22.1098742129 |
| C | 14.8732950270 | 19.3531929458 | 22.1445476500 |
| C | 14.9698999322 | 18.1090946298 | 22.8169718678 |
| C | 16.2097446127 | 17.5152876525 | 23.0840471280 |
| C | 16.0176537323 | 19.9938237095 | 21.6506507686 |
| C | 17.3420053818 | 18.1581864112 | 22.5852238441 |
| C | 17.2438822584 | 19.3605995387 | 21.8591684631 |
| O | 13.7982139978 | 17.5164183221 | 23.2685437687 |
| O | 13.8215865729 | 13.1597213859 | 21.2001778202 |
| C | 14.8569682661 | 12.9573586462 | 20.2935688589 |
| C | 14.5668830503 | 12.1277831266 | 19.1827156533 |
| O | 13.2390093601 | 11.7754380770 | 18.9465687000 |
| C | 16.1669270511 | 13.3874746361 | 20.5469736460 |
| C | 17.1710129895 | 12.9143002424 | 19.6979462568 |
| C | 16.8905707930 | 12.0024084818 | 18.6598491758 |
| C | 15.5842817232 | 11.6053100023 | 18.3748071348 |
| O | 12.4127359923 | 13.5554786108 | 14.5478471084 |
| O | 12.1263790121 | 16.0188172750 | 13.4390961199 |
| C | 13.3932534503 | 15.4527749418 | 13.4545934750 |
| C | 13.5570632241 | 14.1958444929 | 14.0890809327 |
| C | 14.4554083095 | 16.0845485782 | 12.7970641277 |
| C | 15.7017029027 | 15.4648937675 | 12.8659936822 |
| C | 15.8809036536 | 14.2440657861 | 13.5439052836 |
| C | 14.8116775380 | 13.5733419346 | 14.1393956010 |
| N | 16.9573748234 | 15.8450135970 | 12.4021253700 |
| N | 17.2406196260 | 13.9500148625 | 13.4613770250 |
| C | 17.9232992975 | 14.9561540664 | 12.8158472243 |
| N | 17.6530572423 | 20.7223090701 | 15.1959329686 |
| N | 17.7190941662 | 22.0695982639 | 16.9229120158 |
| C | 18.5043987026 | 21.5097431620 | 15.9355818177 |
| N | 18.5434485586 | 19.6958924114 | 21.4845584342 |
| C | 19.4419793324 | 18.7440732807 | 21.9110300127 |
| N | 18.6950669566 | 17.8308584144 | 22.6213100607 |
| N | 18.5523205366 | 13.0853625703 | 19.7026135716 |

|    |               |               |               |
|----|---------------|---------------|---------------|
| N  | 18.1180335323 | 11.6530081831 | 18.1020016568 |
| C  | 19.1541063680 | 12.2913245451 | 18.7544407263 |
| H  | 9.6223142521  | 17.4436944582 | 16.9685513233 |
| H  | 13.2385180417 | 18.3959957141 | 13.7671752938 |
| H  | 9.9096420941  | 14.8115516377 | 18.1524557061 |
| H  | 13.6348700302 | 12.1297478859 | 16.3887901151 |
| H  | 10.2948157319 | 16.0072760526 | 20.7638591272 |
| H  | 14.8000824390 | 15.1784164781 | 22.5682314720 |
| H  | 10.0691863500 | 18.6403158295 | 19.5724536139 |
| H  | 14.1017961280 | 21.4272236731 | 19.9797230898 |
| H  | 15.0854236319 | 19.6960975771 | 14.2867571798 |
| H  | 15.2437073837 | 22.6971082124 | 18.3359700775 |
| H  | 15.9406323158 | 20.9507573508 | 21.1391705245 |
| H  | 16.2632750982 | 16.5913829560 | 23.6569979983 |
| H  | 14.2938358640 | 17.0211483560 | 12.2668203036 |
| H  | 14.9312250820 | 12.6060116162 | 14.6224863821 |
| H  | 15.3423530613 | 10.9019978366 | 17.5798915057 |
| H  | 16.3902186807 | 14.0220782806 | 21.4020047857 |
| C  | 10.0643012694 | 21.2932557141 | 16.6480657378 |
| H  | 9.5222332192  | 19.4981971181 | 17.6488500731 |
| H  | 9.3294336643  | 21.1105249265 | 15.8500611015 |
| H  | 10.9199118440 | 21.8211088310 | 16.2171592060 |
| H  | 9.5977628046  | 21.9471003936 | 17.3998486403 |
| C  | 11.0808478882 | 18.8393958098 | 23.3569443647 |
| H  | 12.0527624289 | 19.1334577738 | 23.7625973619 |
| H  | 10.6220700970 | 18.1163232360 | 24.0476037595 |
| H  | 10.4366191248 | 19.7302526787 | 23.3169401739 |
| H  | 10.1562624412 | 17.9856226986 | 21.6447457235 |
| C  | 9.5758165511  | 14.6278948128 | 14.2484920755 |
| H  | 10.3599935911 | 14.3592923008 | 13.5355303037 |
| H  | 8.8925389251  | 15.3382392545 | 13.7597865164 |
| H  | 9.0056921610  | 13.7202319598 | 14.4961436662 |
| H  | 9.2638752716  | 15.4521903686 | 16.1820119293 |
| H  | 10.0483774943 | 13.9362596218 | 20.1284620271 |
| C  | 10.9574049899 | 12.1724481204 | 20.8912903427 |
| H  | 10.5309942164 | 12.3375051609 | 21.8917558651 |
| H  | 10.2851954472 | 11.4985359808 | 20.3396827586 |
| H  | 11.9251528542 | 11.6753271961 | 21.0040502348 |
| Rh | 20.4331256994 | 21.8796570801 | 15.6224062521 |
| I  | 19.5771462297 | 23.8288348301 | 13.9416071928 |
| C  | 22.5466545461 | 21.8897204088 | 14.8526377246 |
| H  | 22.4129710471 | 22.2439178564 | 13.8266435077 |
| C  | 22.4163360224 | 22.8406261660 | 15.8648988493 |
| H  | 22.2281283675 | 23.8722901175 | 15.5522671211 |
| C  | 21.0102573823 | 19.9145940253 | 16.2023003300 |
| H  | 20.1450380345 | 19.2436395329 | 16.1811269895 |
| C  | 21.1110132587 | 20.7756294131 | 17.3305694897 |
| H  | 20.2996931750 | 20.6836032483 | 18.0568021721 |
| C  | 22.4240025725 | 21.2959556505 | 17.9066497521 |
| C  | 22.1580095213 | 19.4239767515 | 15.3502426996 |
| C  | 22.8336844272 | 22.6646590471 | 17.3113290916 |
| C  | 23.1943975825 | 20.5249547431 | 15.0249529002 |
| H  | 23.7289277834 | 20.2610086209 | 14.0991476224 |
| H  | 23.9607365054 | 20.5759760979 | 15.8119478176 |
| H  | 22.6361530321 | 18.5496968686 | 15.8316156197 |
| H  | 21.7219204023 | 19.0419604707 | 14.4125767141 |
| H  | 22.3238901546 | 21.3869775652 | 19.0002163840 |
| H  | 23.2157359371 | 20.5486231066 | 17.7449705310 |
| H  | 22.3516972091 | 23.4673779195 | 17.8916625882 |
| H  | 23.9230283461 | 22.8249119529 | 17.4192505986 |
| Rh | 21.3782208879 | 18.6008228941 | 21.4600979445 |

|    |               |               |               |
|----|---------------|---------------|---------------|
| I  | 20.5191683703 | 17.3812292645 | 19.2116364432 |
| C  | 21.9153216431 | 20.2514288339 | 22.6894449317 |
| H  | 21.0184780939 | 20.8369936880 | 22.9207500789 |
| C  | 22.0958728533 | 19.0511187364 | 23.4369498976 |
| H  | 21.3083408821 | 18.8097871446 | 24.1568932738 |
| C  | 23.3954623039 | 17.6966663960 | 21.2872780049 |
| H  | 23.2293329651 | 16.8330460085 | 20.6347630001 |
| C  | 23.4481490265 | 18.9469429982 | 20.6707894406 |
| H  | 23.2843425470 | 18.9681696115 | 19.5898042983 |
| C  | 23.8654263730 | 17.3673903788 | 22.6886058403 |
| C  | 23.4563799760 | 18.4279917828 | 23.7397024333 |
| C  | 24.0604572695 | 20.1951020329 | 21.2866440169 |
| C  | 23.0187143582 | 21.0619113908 | 22.0383776738 |
| H  | 23.4230518873 | 16.3973672321 | 22.9656322365 |
| H  | 24.9608099198 | 17.2137101789 | 22.6988059101 |
| H  | 24.2174996969 | 19.2195392862 | 23.8060531668 |
| H  | 23.4271334841 | 17.9570483365 | 24.7344092324 |
| H  | 24.5193571576 | 20.7977440820 | 20.4871939399 |
| H  | 24.8802722599 | 19.9099481414 | 21.9614864882 |
| H  | 22.5433065895 | 21.7518624194 | 21.3217118140 |
| H  | 23.5194182108 | 21.7044681385 | 22.7872719401 |
| Rh | 21.1069414740 | 12.0424902745 | 18.4690207811 |
| I  | 20.9378951223 | 10.1372226855 | 20.3918277390 |
| C  | 21.3915716925 | 13.8922283139 | 17.4056945315 |
| H  | 20.6009691014 | 14.5892404156 | 17.6965394495 |
| C  | 21.0127854332 | 12.8544072615 | 16.5100422364 |
| H  | 19.9742120701 | 12.8878186166 | 16.1664279779 |
| C  | 23.2950471664 | 12.2750509732 | 18.7676448819 |
| H  | 23.4536423596 | 11.8478795071 | 19.7627995492 |
| C  | 23.1111320385 | 11.3693901093 | 17.7216811339 |
| H  | 23.1100159815 | 10.3084801605 | 17.9870134443 |
| C  | 21.9378136300 | 12.0976247798 | 15.5800411446 |
| C  | 23.2773912457 | 11.6983268516 | 16.2454565883 |
| C  | 23.6160357216 | 13.7494810163 | 18.6331632580 |
| C  | 22.7997892345 | 14.4589498359 | 17.5276331203 |
| H  | 21.4127293218 | 11.1841297214 | 15.2552050935 |
| H  | 22.1194119770 | 12.6862553761 | 14.6610224447 |
| H  | 23.6949140812 | 10.8212292569 | 15.7270850814 |
| H  | 24.0166167662 | 12.5030665182 | 16.1252238999 |
| H  | 23.3132695718 | 14.3917313408 | 16.5568675454 |
| H  | 22.7210880294 | 15.5325109339 | 17.7624344149 |
| H  | 23.3867753451 | 14.2268591493 | 19.5999934847 |
| H  | 24.7010045805 | 13.8930547467 | 18.4724637211 |
| Rh | 19.8940258507 | 15.2460176688 | 12.7410929146 |
| I  | 19.4995832647 | 16.3779710043 | 15.1669070094 |
| C  | 22.1201177968 | 15.0778755847 | 12.9621871717 |
| H  | 22.2427729704 | 15.0091629802 | 14.0476305931 |
| C  | 21.8000618846 | 16.3336130391 | 12.4458856985 |
| H  | 21.7338656309 | 17.1575908878 | 13.1634067012 |
| C  | 20.2410037471 | 13.6875362908 | 11.3343125107 |
| H  | 19.3705528085 | 13.0224940184 | 11.3109446282 |
| C  | 20.1119155214 | 14.9200753231 | 10.6295913818 |
| H  | 19.1456685067 | 15.0997976155 | 10.1491545390 |
| C  | 22.6624203014 | 13.9215458942 | 12.1371540272 |
| C  | 21.5437697100 | 12.9738430536 | 11.6372292351 |
| C  | 21.2834513533 | 15.6876300728 | 10.0210966144 |
| C  | 21.8660611662 | 16.7462097535 | 10.9904778207 |
| H  | 22.0644623637 | 14.9790224999 | 9.7076314734  |
| H  | 20.9479213690 | 16.1895778546 | 9.1004659274  |
| H  | 21.3366631255 | 12.2232199213 | 12.4173041746 |
| H  | 21.8868500004 | 12.4048437041 | 10.7524768326 |

|   |               |               |               |
|---|---------------|---------------|---------------|
| H | 23.2409576204 | 14.3141144953 | 11.2885813555 |
| H | 23.3758256738 | 13.3471697468 | 12.7492611699 |
| H | 21.2939828313 | 17.6818258190 | 10.8874454273 |
| H | 22.9064173663 | 16.9964238504 | 10.7102022115 |
| C | 18.3065636924 | 10.5641995103 | 17.1536815503 |
| H | 17.6804947986 | 10.7187298463 | 16.2632507342 |
| H | 19.3698182877 | 10.5489558662 | 16.8737504068 |
| H | 18.0520500627 | 9.6031440044  | 17.6252611559 |
| C | 17.8813779877 | 12.8555224985 | 14.1742509135 |
| H | 18.9524842044 | 12.8758466836 | 13.9293212744 |
| H | 17.7654026127 | 12.9977515378 | 15.2595559334 |
| H | 17.4432283730 | 11.8945510769 | 13.8680150002 |
| C | 18.0587662264 | 19.9709360661 | 14.0160366703 |
| H | 17.4267634594 | 20.2584026136 | 13.1631071177 |
| H | 19.1004564092 | 20.2444262336 | 13.7941161528 |
| H | 18.0012291820 | 18.8882925128 | 14.2084165385 |
| C | 17.2277045825 | 17.0851333564 | 11.6899459339 |
| H | 16.8539729614 | 17.9409503457 | 12.2701510873 |
| H | 18.3189555043 | 17.1729107054 | 11.5817573159 |
| H | 16.7486969763 | 17.0738227495 | 10.6999850160 |
| C | 18.1799615490 | 23.1250883287 | 17.8141583950 |
| H | 17.7737929445 | 22.9706809262 | 18.8236894732 |
| H | 19.2793105988 | 23.0841337271 | 17.8340588616 |
| H | 17.8700521217 | 24.1094051589 | 17.4319851442 |
| C | 18.8757744874 | 20.7979329846 | 20.5942274374 |
| H | 18.5357212045 | 21.7510860313 | 21.0244104411 |
| H | 19.9678993999 | 20.8104712875 | 20.4705517511 |
| H | 18.4096304838 | 20.6389727629 | 19.6100181117 |
| C | 19.2381104791 | 16.6406024754 | 23.2602669271 |
| H | 20.3059447280 | 16.5850528306 | 23.0011519915 |
| H | 19.1179971272 | 16.6991776373 | 24.3519835944 |
| H | 18.7272720604 | 15.7431474833 | 22.8831035800 |
| C | 19.2797600234 | 13.9138242065 | 20.6536576038 |
| H | 19.1156653742 | 13.5401065360 | 21.6753126575 |
| H | 20.3492694752 | 13.8343466709 | 20.4106397563 |
| H | 18.9730477577 | 14.9654368631 | 20.5559611321 |

**Vase\_3E =** -1324.4242722820

|   |               |               |               |
|---|---------------|---------------|---------------|
| C | 11.9884431432 | 16.2306898221 | 20.6339212018 |
| C | 11.2514359945 | 15.2407645969 | 19.9570476041 |
| C | 11.7197059070 | 13.9490419802 | 19.6810920502 |
| C | 13.2573427463 | 15.8564636999 | 21.1040978477 |
| C | 13.7813072203 | 14.5910484556 | 20.8201668606 |
| C | 13.0367347222 | 13.6665082542 | 20.0863291227 |
| C | 11.3809365242 | 17.6276907460 | 20.7380764284 |
| C | 11.8986891467 | 18.5259321952 | 19.6098597202 |
| C | 11.1067250883 | 18.6818309660 | 18.4605535144 |
| C | 11.4310523874 | 19.5139985119 | 17.3760753955 |
| C | 10.5831309209 | 19.4398865230 | 16.1095943832 |
| C | 11.2127123320 | 18.4443108448 | 15.1281280128 |
| C | 10.6470365930 | 17.1633171576 | 15.0518370878 |
| C | 11.0615168732 | 16.1377522217 | 14.1838119701 |
| C | 12.3148037837 | 18.6887201294 | 14.2822158578 |
| C | 12.7237533110 | 17.7170592854 | 13.3628976375 |
| C | 12.1023232983 | 16.4620318628 | 13.2974382676 |
| C | 13.1232487499 | 19.2196149197 | 19.6207623397 |
| C | 13.4419945466 | 20.1253571608 | 18.6063752761 |
| C | 12.5897289434 | 20.2892361348 | 17.5122931779 |
| C | 10.8061152888 | 12.9466359766 | 18.9667470971 |
| C | 11.2433653117 | 12.7973783284 | 17.5100306741 |

|   |               |               |               |
|---|---------------|---------------|---------------|
| C | 10.3522695184 | 14.7885689662 | 14.3109355365 |
| C | 11.0959985353 | 13.8280711647 | 15.2448357050 |
| C | 10.6746771908 | 13.6854929797 | 16.5741653568 |
| C | 12.2307802945 | 11.9268248394 | 17.0203144648 |
| C | 12.7006446050 | 12.0534611675 | 15.7091431512 |
| C | 12.1911723984 | 13.0351528477 | 14.8611402216 |
| O | 12.8541326195 | 21.2944801240 | 16.5712629844 |
| O | 12.8765010118 | 19.9716284725 | 14.2009228616 |
| C | 14.1034794230 | 20.3643805579 | 14.7314210533 |
| C | 14.0606878182 | 21.1719441444 | 15.8976800005 |
| C | 15.1649663638 | 21.9065149732 | 16.3349317032 |
| C | 16.3449137763 | 21.7647859295 | 15.6075226619 |
| C | 16.4295830493 | 20.8928358269 | 14.5055568885 |
| C | 15.3107243386 | 20.1901921792 | 14.0383102780 |
| O | 13.9696289448 | 19.1253908426 | 20.7301387581 |
| C | 15.1548387796 | 18.3967255206 | 20.6839727803 |
| C | 15.1830264906 | 17.1939667253 | 21.4329494227 |
| C | 16.3854634049 | 16.5410799083 | 21.7264647655 |
| C | 16.3199773172 | 18.9003505234 | 20.0897236009 |
| C | 17.5498695592 | 17.0850460614 | 21.1828502276 |
| C | 17.5117316625 | 18.2114028085 | 20.3368613964 |
| O | 13.9834931317 | 16.7120736211 | 21.9500644876 |
| O | 13.5167724531 | 12.3723797790 | 19.8982380583 |
| C | 14.5222101344 | 12.0192214845 | 19.0153154767 |
| C | 14.1357322478 | 11.0633703464 | 18.0402911138 |
| O | 12.7720391261 | 10.8887691938 | 17.8112663663 |
| C | 15.8585640454 | 12.4136570782 | 19.1432910922 |
| C | 16.7912475690 | 11.7252773387 | 18.3589188491 |
| C | 16.4222158554 | 10.6420430656 | 17.5382598123 |
| C | 15.0785140800 | 10.3164056905 | 17.3285400882 |
| O | 12.7245748873 | 13.1698411615 | 13.5788515509 |
| O | 12.5113610060 | 15.5553276174 | 12.2907459748 |
| C | 13.7827698159 | 15.0424995651 | 12.5639530170 |
| C | 13.8858920520 | 13.9232614750 | 13.4232944337 |
| C | 14.9195398076 | 15.7019041715 | 12.0892220061 |
| C | 16.1353458548 | 15.3424083845 | 12.6684027854 |
| C | 16.2065334357 | 14.3811481600 | 13.6943461534 |
| C | 15.1016739585 | 13.5983107373 | 14.0384899162 |
| N | 17.3941163043 | 15.9252075461 | 12.5916830686 |
| N | 17.4871484068 | 14.4760940880 | 14.2317250856 |
| C | 18.1996500825 | 15.4840404619 | 13.6225908805 |
| N | 17.7326402779 | 21.0211544715 | 14.0211550922 |
| N | 17.5863193787 | 22.3791268537 | 15.7306786148 |
| C | 18.4529005491 | 21.9350630355 | 14.7594557267 |
| N | 18.8326538218 | 18.4787476590 | 19.9833022357 |
| C | 19.6946463891 | 17.5976676345 | 20.5946875691 |
| N | 18.8911389838 | 16.7458311411 | 21.3236595164 |
| N | 18.1767990374 | 11.8256780562 | 18.2725535548 |
| N | 17.6079682015 | 10.1023640629 | 17.0455584929 |
| C | 18.7011674791 | 10.8207188062 | 17.4832624498 |
| H | 9.8110856908  | 16.9454775565 | 15.7200738117 |
| H | 13.5246979920 | 17.9546382127 | 12.6669032626 |
| H | 9.8622049966  | 14.3282118814 | 16.9208276385 |
| H | 13.4775240593 | 11.3834326790 | 15.3468182831 |
| H | 10.2461633366 | 15.5011737873 | 19.6184995822 |
| H | 14.7573870361 | 14.3132481655 | 21.2106387357 |
| H | 10.1802966688 | 18.1061727131 | 18.3996907001 |
| H | 14.3475002672 | 20.7227543702 | 18.6827692161 |
| H | 15.3512993725 | 19.5666294182 | 13.1471466646 |
| H | 15.0729851095 | 22.5686914175 | 17.1941412203 |
| H | 16.2991572468 | 19.8157777903 | 19.5017754086 |

|    |               |               |               |
|----|---------------|---------------|---------------|
| H  | 16.3891506843 | 15.6646900269 | 22.3723885528 |
| H  | 14.8236586276 | 16.5239352538 | 11.3825237725 |
| H  | 15.1661596418 | 12.8057083459 | 14.7817798342 |
| H  | 14.7553102061 | 9.5423249784  | 16.6341059379 |
| H  | 16.1597361471 | 13.1823791113 | 19.8523387238 |
| C  | 10.1536045048 | 20.7766154478 | 15.4707887476 |
| H  | 9.6507722969  | 18.9481790035 | 16.4326544294 |
| H  | 9.4088556300  | 20.5823766581 | 14.6846802603 |
| H  | 10.9937912848 | 21.3166562651 | 15.0252910551 |
| H  | 9.6900147657  | 21.4246459423 | 16.2292194997 |
| C  | 11.4030642429 | 18.2748766118 | 22.1382453458 |
| H  | 12.4180476119 | 18.4944698840 | 22.4814397632 |
| H  | 10.9298485618 | 17.6001707986 | 22.8670458678 |
| H  | 10.8304830239 | 19.2140542283 | 22.1195474015 |
| H  | 10.3160227663 | 17.4800159400 | 20.4939365356 |
| C  | 9.9036051026  | 14.1456946066 | 12.9815620124 |
| H  | 10.7510255024 | 13.8481969448 | 12.3566664919 |
| H  | 9.2898683559  | 14.8596940779 | 12.4125911473 |
| H  | 9.2911893432  | 13.2556904454 | 13.1884112195 |
| H  | 9.4246861131  | 15.0246518558 | 14.8584834618 |
| H  | 9.8299265299  | 13.4565457104 | 18.9125755186 |
| C  | 10.5616374535 | 11.6413271008 | 19.7509909067 |
| H  | 10.1305041712 | 11.8769792591 | 20.7351055876 |
| H  | 9.8469340186  | 11.0061219330 | 19.2068791271 |
| H  | 11.4807778159 | 11.0678206807 | 19.9025916090 |
| Rh | 20.2956006568 | 22.6105376692 | 14.3578325730 |
| I  | 21.2703532404 | 21.4811285885 | 16.6188883132 |
| C  | 22.1896975902 | 23.8156747231 | 14.1176111088 |
| H  | 22.6037241778 | 23.8167020263 | 15.1291326125 |
| C  | 22.2874569365 | 22.6233415724 | 13.3996719358 |
| H  | 22.7976121543 | 21.7909430034 | 13.8965025173 |
| C  | 19.4927863037 | 24.2896886626 | 13.3439825097 |
| H  | 18.4564800934 | 24.4470128299 | 13.6650944207 |
| C  | 19.7003008644 | 23.2517558645 | 12.3871728167 |
| H  | 18.8003531816 | 22.7134409503 | 12.0772486795 |
| C  | 20.8408315658 | 23.2150267746 | 11.3724562811 |
| C  | 20.3754915439 | 25.5038389767 | 13.5510231089 |
| C  | 22.0768731956 | 22.4533697605 | 11.9096457939 |
| C  | 21.8868257050 | 25.1738924097 | 13.5079325214 |
| H  | 22.4426999360 | 25.9473736753 | 14.0600185524 |
| H  | 22.2592313410 | 25.2120888278 | 12.4745586113 |
| H  | 20.1267702127 | 26.2890340175 | 12.8118373225 |
| H  | 20.1286943079 | 25.9267889224 | 14.5380535454 |
| H  | 20.4887751521 | 22.7250877294 | 10.4515322233 |
| H  | 21.1129660059 | 24.2398031741 | 11.0795311511 |
| H  | 21.9453604442 | 21.3760858136 | 11.7187312506 |
| H  | 22.9886647944 | 22.7497521582 | 11.3579449762 |
| Rh | 21.6963330958 | 17.6010691260 | 20.5461082796 |
| I  | 21.6075892355 | 15.4028245923 | 18.9589741766 |
| C  | 21.7174573655 | 19.6163633230 | 21.2590961104 |
| H  | 20.7232514124 | 20.0612494972 | 21.1531859216 |
| C  | 21.8870141055 | 18.7267497236 | 22.3595188787 |
| H  | 20.9985732693 | 18.5444534568 | 22.9717568631 |
| C  | 23.8211623131 | 17.1201751457 | 21.0141060220 |
| H  | 23.9408649263 | 16.0943301704 | 20.6547215837 |
| C  | 23.8133514957 | 18.1300491815 | 20.0515753557 |
| H  | 23.8803755187 | 17.8133293933 | 19.0060471922 |
| C  | 24.0088462102 | 17.3057378441 | 22.5046431429 |
| C  | 23.2152193271 | 18.5031774046 | 23.0791673920 |
| C  | 24.0984532669 | 19.5975321021 | 20.3296598582 |
| C  | 22.8068344530 | 20.4134767704 | 20.5730457523 |

|    |               |               |               |
|----|---------------|---------------|---------------|
| H  | 23.6667299219 | 16.3805798838 | 22.9947802805 |
| H  | 25.0833630892 | 17.4002676717 | 22.7490851789 |
| H  | 23.8156578653 | 19.4235375253 | 23.0269836197 |
| H  | 23.0217879027 | 18.3297270012 | 24.1490157707 |
| H  | 24.6368385670 | 20.0253443534 | 19.4699205499 |
| H  | 24.7775305387 | 19.6824756389 | 21.1903811533 |
| H  | 22.4085622051 | 20.7530113354 | 19.6017676083 |
| H  | 23.0315064460 | 21.3336148583 | 21.1447352427 |
| Rh | 20.6343256659 | 10.4343819762 | 17.1260228518 |
| I  | 20.2809050413 | 11.1657238482 | 14.5309956297 |
| C  | 20.8401123950 | 9.0843008726  | 18.7803602404 |
| H  | 19.8605220480 | 8.6401965986  | 18.9811158137 |
| C  | 21.0268924531 | 10.4227597338 | 19.2313743686 |
| H  | 20.1847087061 | 10.8610741894 | 19.7752410496 |
| C  | 22.5172853102 | 9.4121011683  | 16.4966743800 |
| H  | 22.4472265680 | 9.3866757003  | 15.4057857766 |
| C  | 22.8642430951 | 10.6309192851 | 17.0793316349 |
| H  | 22.9933643345 | 11.4795778428 | 16.3998834866 |
| C  | 22.3508662832 | 11.0927486197 | 19.5342610838 |
| C  | 23.4401555058 | 10.7940712847 | 18.4770617982 |
| C  | 22.5405893160 | 8.0573854547  | 17.1705940472 |
| C  | 21.9757470355 | 8.0778985302  | 18.6099934807 |
| H  | 22.1744751837 | 12.1816833335 | 19.5684138280 |
| H  | 22.7049300489 | 10.8113148151 | 20.5441288611 |
| H  | 24.1673615672 | 11.6206082687 | 18.4677165629 |
| H  | 24.0049875743 | 9.8902647685  | 18.7477344700 |
| H  | 22.7726975412 | 8.3058648683  | 19.3333862077 |
| H  | 21.6105163531 | 7.0723188963  | 18.8704100641 |
| H  | 21.9320388392 | 7.3758923713  | 16.5556967464 |
| H  | 23.5653364758 | 7.6412941034  | 17.1621723504 |
| Rh | 19.7860003402 | 16.4732577989 | 14.3153590192 |
| I  | 17.8949131373 | 17.6366422379 | 15.9342297983 |
| C  | 21.5519019200 | 17.2344266152 | 15.4868906821 |
| H  | 21.1355580875 | 17.3578259389 | 16.4914108032 |
| C  | 21.1870347402 | 18.1708542705 | 14.5222960448 |
| H  | 20.5627728200 | 19.0041158849 | 14.8599510185 |
| C  | 21.2093845531 | 14.9983735083 | 13.7533622808 |
| H  | 20.6857581331 | 14.0495573812 | 13.5882917235 |
| C  | 21.1226948710 | 15.9693016217 | 12.7127995309 |
| H  | 20.5370577041 | 15.6714983911 | 11.8376422054 |
| C  | 22.7243184012 | 16.2784990879 | 15.3681759251 |
| C  | 22.2944015571 | 14.9050222875 | 14.8026403880 |
| C  | 22.1719288919 | 17.0472911050 | 12.4416489600 |
| C  | 21.8664154640 | 18.3720759464 | 13.1835823180 |
| H  | 23.1661368877 | 16.6699067338 | 12.7228218367 |
| H  | 22.2204248209 | 17.2403874270 | 11.3588429072 |
| H  | 21.9001034325 | 14.2837663396 | 15.6247134809 |
| H  | 23.1643693777 | 14.3523241280 | 14.4001804324 |
| H  | 23.5118305366 | 16.7277646861 | 14.7466777523 |
| H  | 23.1545240184 | 16.1311501389 | 16.3713412359 |
| H  | 21.1971791854 | 18.9873900551 | 12.5602232297 |
| H  | 22.7876134835 | 18.9709271601 | 13.3139453520 |
| C  | 17.6739116787 | 8.9330258346  | 16.1776085262 |
| H  | 17.2488874357 | 9.1645619436  | 15.1900633369 |
| H  | 18.7330854952 | 8.6700766092  | 16.0494847835 |
| H  | 17.1280679257 | 8.0969911319  | 16.6379438248 |
| C  | 17.8674372536 | 13.8449659138 | 15.4890538345 |
| H  | 18.9159951798 | 14.0936809665 | 15.6966856512 |
| H  | 17.2324561408 | 14.2362136589 | 16.2979504464 |
| H  | 17.7778569346 | 12.7544042983 | 15.4024958782 |
| C  | 18.3068874804 | 20.1759541749 | 12.9862585688 |



|   |               |               |               |
|---|---------------|---------------|---------------|
| H | 17.7014457600 | 20.2295822097 | 12.0701960929 |
| H | 19.3226960705 | 20.5421734005 | 12.7842058263 |
| H | 18.3601480112 | 19.1411382062 | 13.3594347575 |
| C | 17.7325268839 | 16.9780292563 | 11.6513577848 |
| H | 17.0485646297 | 17.8311814431 | 11.7721213023 |
| H | 18.7586097975 | 17.3040282705 | 11.8728764625 |
| H | 17.6670156018 | 16.6022749286 | 10.6196620199 |
| C | 17.9062029628 | 23.3693466034 | 16.7495310789 |
| H | 17.7858714460 | 22.9298235136 | 17.7506357992 |
| H | 18.9566777417 | 23.6629664454 | 16.6177312757 |
| H | 17.2499190499 | 24.2460651133 | 16.6476375628 |
| C | 19.2333264717 | 19.5097162657 | 19.0288731570 |
| H | 19.0366876168 | 20.5137099025 | 19.4311313938 |
| H | 20.3068094810 | 19.3985895774 | 18.8354168737 |
| H | 18.7008850481 | 19.3626902607 | 18.0772725458 |
| C | 19.3756534230 | 15.6464324305 | 22.1448526396 |
| H | 20.4734164546 | 15.6430260077 | 22.0838973729 |
| H | 19.0545535612 | 15.7813084146 | 23.1881962552 |
| H | 18.9961544870 | 14.6877646269 | 21.7607649715 |
| C | 18.9397879322 | 12.9426760562 | 18.8194522608 |
| H | 18.9585401489 | 12.9116228042 | 19.9186117117 |
| H | 19.9661075742 | 12.8762719919 | 18.4406237788 |
| H | 18.5081673078 | 13.8980964888 | 18.4888786841 |

#### Vase\_4

|     |                  |               |               |
|-----|------------------|---------------|---------------|
| E = | -1324.4252028537 |               |               |
| C   | 11.0914334476    | 13.0720507874 | 20.1865181949 |
| C   | 10.8960204901    | 11.9712401715 | 19.3405742134 |
| C   | 11.6982037677    | 10.8128085196 | 19.3117236421 |
| C   | 12.1931092675    | 12.9914139921 | 21.0546640203 |
| C   | 12.9507013961    | 11.8219004234 | 21.1392024582 |
| C   | 12.7191837335    | 10.7440162299 | 20.2768851508 |
| C   | 10.0841037728    | 14.2238166914 | 20.1508368737 |
| C   | 10.5113149299    | 15.4176990787 | 19.2921594117 |
| C   | 10.1093946699    | 15.4305824863 | 17.9470806260 |
| C   | 10.3808192561    | 16.4578588013 | 17.0257966979 |
| C   | 10.0229919626    | 16.1940131384 | 15.5636769361 |
| C   | 11.1743772060    | 15.4371497780 | 14.8988782609 |
| C   | 10.9967563625    | 14.0993021174 | 14.5310611296 |
| C   | 11.9757623448    | 13.3122772565 | 13.9042927261 |
| C   | 12.4366257673    | 16.0031987187 | 14.6411788788 |
| C   | 13.4535537459    | 15.2585402106 | 14.0320992434 |
| C   | 13.2210408827    | 13.9265066517 | 13.6575677239 |
| C   | 11.2450304126    | 16.5364807203 | 19.7276519302 |
| C   | 11.4482756386    | 17.6247015310 | 18.8743161924 |
| C   | 11.0371047037    | 17.5866424906 | 17.5384251840 |
| C   | 11.3907339657    | 9.7944464152  | 18.2116210817 |
| C   | 12.2192225320    | 10.0768714433 | 16.9546950662 |
| C   | 11.6219540082    | 11.8534057535 | 13.5960283382 |
| C   | 12.3097598891    | 10.9746761749 | 14.6394182021 |
| C   | 11.6304582255    | 10.6942994175 | 15.8409200077 |
| C   | 13.5823796061    | 9.7576739752  | 16.8377320836 |
| C   | 14.2701964599    | 9.9290698287  | 15.6391709205 |
| C   | 13.6340392488    | 10.5266870444 | 14.5490035210 |
| O   | 11.2675699998    | 18.7308711066 | 16.7462123762 |
| O   | 12.5201039064    | 17.3848165303 | 14.7897314922 |
| C   | 13.3255134317    | 18.1633403783 | 15.5963610769 |
| C   | 12.6109152980    | 18.9968516469 | 16.5027665449 |
| C   | 13.2015234462    | 20.1223397411 | 17.0817246064 |

|   |               |               |               |
|---|---------------|---------------|---------------|
| C | 14.5488803499 | 20.3484511819 | 16.7869732235 |
| C | 15.2965734924 | 19.4385568216 | 16.0149422939 |
| C | 14.6999231404 | 18.3381226960 | 15.3889747912 |
| O | 11.7954436871 | 16.5901963771 | 21.0260476181 |
| C | 13.1508353008 | 16.2325237528 | 21.0096953169 |
| C | 13.5121986018 | 14.9133014914 | 21.3683534725 |
| C | 14.8215947105 | 14.4486915198 | 21.1869169664 |
| C | 14.1089848830 | 17.1454896906 | 20.5473554473 |
| C | 15.7368890763 | 15.3304522830 | 20.6187278018 |
| C | 15.3970055118 | 16.6636923095 | 20.3297070173 |
| O | 12.5180030396 | 14.0761078020 | 21.8812539028 |
| O | 13.5251229976 | 9.5917339981  | 20.4530645533 |
| C | 14.8522653175 | 9.7941380477  | 20.0768059842 |
| C | 15.1644222315 | 9.7451397794  | 18.6931066164 |
| O | 14.2038979985 | 9.1277473517  | 17.9137441013 |
| C | 15.8466474898 | 10.0083901898 | 21.0366945815 |
| C | 17.1303503253 | 10.2963410380 | 20.5589595036 |
| C | 17.3804801125 | 10.4627811732 | 19.1843625234 |
| C | 16.4155184036 | 10.1579230129 | 18.2187206510 |
| O | 14.3228963389 | 10.6218394338 | 13.3344430489 |
| O | 14.1425365902 | 13.2738532044 | 12.8293669789 |
| C | 15.3865141356 | 12.7821191306 | 13.2072609507 |
| C | 15.4887230688 | 11.3771163125 | 13.3741405947 |
| C | 16.5369014641 | 13.5822899523 | 13.1871299698 |
| C | 17.7711592537 | 12.9365218688 | 13.3210668397 |
| C | 17.8611713939 | 11.5362905273 | 13.4383756291 |
| C | 16.7233723170 | 10.7308211232 | 13.4744318550 |
| N | 19.0842304266 | 13.4041859377 | 13.2762430373 |
| N | 19.2168531383 | 11.2247778177 | 13.4479671917 |
| C | 19.9811009768 | 12.3630237617 | 13.3041821113 |
| N | 16.6001770220 | 19.9391244182 | 15.9820752285 |
| N | 15.4221072114 | 21.3706418571 | 17.1479352432 |
| C | 16.6879681331 | 21.1389978251 | 16.6557202015 |
| N | 16.4996427957 | 17.2169984164 | 19.6845737143 |
| C | 17.4713020906 | 16.2673104213 | 19.4824274356 |
| N | 17.0232098644 | 15.1387747276 | 20.1309565349 |
| N | 18.3447504526 | 10.5168963878 | 21.2066034674 |
| N | 18.7181815557 | 10.8465298807 | 19.0716177999 |
| C | 19.3352741121 | 10.8564642278 | 20.3100013050 |
| H | 10.0257871459 | 13.6406469096 | 14.7296212076 |
| H | 14.4012474077 | 15.7284372898 | 13.7779723714 |
| H | 10.5852866551 | 11.0022843875 | 15.9188063095 |
| H | 15.2950149306 | 9.5800726359  | 15.5408590190 |
| H | 10.0621936886 | 12.0189847338 | 18.6366056904 |
| H | 13.7395436933 | 11.7475001693 | 21.8848680578 |
| H | 9.5672928717  | 14.5576303023 | 17.5763156468 |
| H | 11.9549625313 | 18.5129766576 | 19.2448612120 |
| H | 15.2614299818 | 17.6766976529 | 14.7321843467 |
| H | 12.6145797779 | 20.7770265942 | 17.7239576815 |
| H | 13.8224259631 | 18.1597800047 | 20.2811786877 |
| H | 15.0838938793 | 13.4166620558 | 21.4070036805 |
| H | 16.4645353452 | 14.6552398836 | 13.0232797913 |
| H | 16.7671927179 | 9.6445435872  | 13.5328698771 |
| H | 16.6358563126 | 10.1937548892 | 17.1536500594 |
| H | 15.6061443997 | 9.9635291953  | 22.0978909566 |
| C | 9.4803141819  | 17.3851745714 | 14.7477763212 |
| H | 9.2006311442  | 15.4607524427 | 15.6098805004 |
| H | 10.2384766005 | 18.1532481059 | 14.5708621504 |

|    |               |               |               |
|----|---------------|---------------|---------------|
| H  | 8.6366680643  | 17.8521370416 | 15.2774418739 |
| H  | 9.1162949861  | 17.0249027899 | 13.7742171080 |
| C  | 9.5352617388  | 14.6081355923 | 21.5419901065 |
| H  | 10.3079935341 | 15.0367522109 | 22.1877822590 |
| H  | 9.1201473593  | 13.7177987603 | 22.0367070754 |
| H  | 8.7277809298  | 15.3469168280 | 21.4310943871 |
| H  | 9.2276880647  | 13.8028884403 | 19.5982563705 |
| C  | 11.7579675570 | 11.4418541685 | 12.1164155026 |
| H  | 12.7741571273 | 11.5725548790 | 11.7347052510 |
| H  | 11.0768303138 | 12.0527438071 | 11.5054754705 |
| H  | 11.4754776092 | 10.3860579834 | 11.9910258784 |
| H  | 10.5479340345 | 11.7751048157 | 13.8327022964 |
| H  | 10.3549220524 | 10.0230893590 | 17.9107178928 |
| C  | 11.3877746504 | 8.3152238782  | 18.6499784963 |
| H  | 11.0427623861 | 7.6828218489  | 17.8187468589 |
| H  | 12.3786277532 | 7.9710230894  | 18.9610259642 |
| H  | 10.6962078086 | 8.1784790968  | 19.4946386657 |
| Rh | 18.2365308002 | 22.4050011238 | 16.7767430160 |
| I  | 18.6012328344 | 21.7098012624 | 19.3738694588 |
| C  | 19.3574453003 | 24.2879697214 | 17.1732830930 |
| H  | 19.3791362405 | 24.3482760528 | 18.2650489179 |
| C  | 20.2411535814 | 23.3905982940 | 16.5739061785 |
| H  | 20.8583387600 | 22.7876146702 | 17.2466534110 |
| C  | 17.5631521651 | 23.5440993045 | 15.0869672088 |
| H  | 16.4826494244 | 23.4031505383 | 14.9881615101 |
| C  | 18.3765586942 | 22.4595088126 | 14.6470891780 |
| H  | 17.8419255550 | 21.6080172989 | 14.2140823912 |
| C  | 19.8233328077 | 22.5496712704 | 14.2054407471 |
| C  | 18.0163687472 | 25.0016042542 | 15.1138529972 |
| C  | 20.6828650767 | 23.4541634432 | 15.1204660878 |
| C  | 18.6146912397 | 25.4104309414 | 16.4809440965 |
| H  | 17.7985742295 | 25.7251773907 | 17.1502046243 |
| H  | 19.2722504198 | 26.2928447026 | 16.3691810771 |
| H  | 18.7438438620 | 25.1727138653 | 14.3064510013 |
| H  | 17.1571590036 | 25.6512940586 | 14.8861567816 |
| H  | 20.2369505701 | 21.5279133185 | 14.2200015914 |
| H  | 19.8884110799 | 22.8870058708 | 13.1536013438 |
| H  | 21.7375307898 | 23.1455246964 | 15.0517099297 |
| H  | 20.6496792502 | 24.4959832194 | 14.7708883282 |
| Rh | 19.0180013180 | 16.2821757193 | 18.2051848401 |
| I  | 17.2282122620 | 15.1892399102 | 16.4343276959 |
| C  | 20.0924538145 | 17.8478247736 | 19.1774997578 |
| H  | 19.3965126393 | 18.4339769452 | 19.7883844273 |
| C  | 20.5301361612 | 16.6036735368 | 19.7076321773 |
| H  | 20.1074061393 | 16.2910470109 | 20.6667434559 |
| C  | 20.7089802934 | 15.3789463062 | 17.1572435088 |
| H  | 20.2327807437 | 14.5660592254 | 16.5995784183 |
| C  | 20.5572412162 | 16.6650948703 | 16.6273602822 |
| H  | 19.9669780306 | 16.7471524837 | 15.7103688677 |
| C  | 21.7188943001 | 14.9445439118 | 18.1979212291 |
| C  | 21.8621954636 | 15.9514683220 | 19.3593972566 |
| C  | 21.4234464024 | 17.8622335711 | 16.9828136391 |
| C  | 20.8404935130 | 18.6837139491 | 18.1596626582 |
| H  | 21.3841467719 | 13.9795173707 | 18.6166566741 |
| H  | 22.6989908802 | 14.7492866130 | 17.7239516075 |
| H  | 22.6048192268 | 16.7257796992 | 19.1180069258 |
| H  | 22.2345830734 | 15.4173889678 | 20.2477003365 |
| H  | 21.5156813440 | 18.5149238795 | 16.1004951234 |

|    |               |               |               |
|----|---------------|---------------|---------------|
| H  | 22.4435353317 | 17.5224813893 | 17.2143471108 |
| H  | 20.1354913315 | 19.4383837214 | 17.7755505301 |
| H  | 21.6360600437 | 19.2654866692 | 18.6623866823 |
| Rh | 21.2823486165 | 11.1206793966 | 20.7195167436 |
| I  | 20.7283538607 | 13.4115863473 | 22.0665489553 |
| C  | 21.7765721255 | 9.6633851949  | 19.2336261466 |
| H  | 20.9166380820 | 9.4744871988  | 18.5840734202 |
| C  | 21.7332037107 | 9.0335180158  | 20.5106151058 |
| H  | 20.8244407156 | 8.4673250282  | 20.7356980387 |
| C  | 23.4686788702 | 11.5567935524 | 20.4964420977 |
| H  | 23.4650932077 | 12.6431850038 | 20.3630231495 |
| C  | 23.2437724383 | 11.0864059952 | 21.7900625172 |
| H  | 23.1243523501 | 11.8371419210 | 22.5757092433 |
| C  | 22.9695381963 | 8.5927520394  | 21.2902447985 |
| C  | 23.4636514298 | 9.6725566318  | 22.2811327551 |
| C  | 24.0887064414 | 10.7398089960 | 19.3734930935 |
| C  | 23.0212447913 | 10.0732876362 | 18.4760673017 |
| H  | 22.7361005803 | 7.6716328718  | 21.8462122245 |
| H  | 23.7675034976 | 8.3230737038  | 20.5824691749 |
| H  | 22.9151812132 | 9.5675229662  | 23.2303516018 |
| H  | 24.5301811394 | 9.5138025040  | 22.5276105924 |
| H  | 23.4528837465 | 9.2092821450  | 17.9353885331 |
| H  | 22.7124434109 | 10.7904173573 | 17.6976973959 |
| H  | 24.7202668483 | 11.3980176361 | 18.7566027959 |
| H  | 24.7632549275 | 9.9826432853  | 19.7984953674 |
| Rh | 21.9584494086 | 12.4093986887 | 12.9959573989 |
| I  | 21.3076773268 | 12.5798443764 | 10.3756635831 |
| C  | 24.0869818826 | 13.0379352770 | 12.6810637393 |
| H  | 24.0156221563 | 13.6591650686 | 11.7840409823 |
| C  | 23.9817055420 | 11.6583115600 | 12.5000644645 |
| H  | 23.8688685599 | 11.3019119685 | 11.4717342119 |
| C  | 22.3912110664 | 13.0842795765 | 14.9606054059 |
| H  | 21.4779280186 | 13.4945171517 | 15.4012590158 |
| C  | 22.4995071126 | 11.6630205664 | 14.9346661506 |
| H  | 21.6513538682 | 11.1096970441 | 15.3510356027 |
| C  | 24.6502934997 | 13.7002381566 | 13.9280276803 |
| C  | 23.5485408428 | 14.0618479414 | 14.9541703982 |
| C  | 23.8254628560 | 10.9053029589 | 14.9447292551 |
| C  | 24.3415803976 | 10.5959458007 | 13.5180329059 |
| H  | 24.5730831965 | 11.4809147719 | 15.5118086423 |
| H  | 23.6998014989 | 9.9600842468  | 15.4948405578 |
| H  | 23.1365064953 | 15.0558982751 | 14.7167585542 |
| H  | 23.9837948373 | 14.1514463875 | 15.9680248209 |
| H  | 25.3991752338 | 13.0396536060 | 14.3888295547 |
| H  | 25.1907693655 | 14.6142844278 | 13.6376063729 |
| H  | 23.8970741543 | 9.6486188074  | 13.1746713803 |
| H  | 25.4352213016 | 10.4304950549 | 13.5302852427 |
| C  | 19.2973747987 | 11.3713669148 | 17.8361963484 |
| H  | 18.6853079068 | 12.2087660679 | 17.4620145387 |
| H  | 20.3081984166 | 11.7349158508 | 18.0646174191 |
| H  | 19.3532770089 | 10.5888392732 | 17.0644495377 |
| C  | 19.7417255185 | 9.8676063628  | 13.3994474525 |
| H  | 20.8382939929 | 9.9404696755  | 13.3549359149 |
| H  | 19.4335104735 | 9.3035333636  | 14.2924472878 |
| H  | 19.3811040281 | 9.3550362052  | 12.4952306394 |
| C  | 17.7354671739 | 19.2130570386 | 15.4204266818 |
| H  | 17.6282817378 | 19.1085404913 | 14.3305616064 |
| H  | 18.6441979023 | 19.7853664988 | 15.6507967859 |

|   |               |               |               |
|---|---------------|---------------|---------------|
| H | 17.8006675778 | 18.2132318178 | 15.8808395634 |
| C | 19.4525065684 | 14.7997055521 | 13.0728908480 |
| H | 20.5428012593 | 14.8774178142 | 13.1825300609 |
| H | 19.1778440560 | 15.1156610137 | 12.0555947485 |
| H | 18.9467665931 | 15.4176606770 | 13.8303207473 |
| C | 15.0428705671 | 22.5231597779 | 17.9550789935 |
| H | 14.1844415517 | 23.0356843422 | 17.4978067097 |
| H | 14.7895937165 | 22.2061837989 | 18.9774536955 |
| H | 15.9087548960 | 23.1991438087 | 17.9986121062 |
| C | 16.5171470058 | 18.5630608363 | 19.1362871087 |
| H | 17.4113121330 | 18.6715378302 | 18.5118472929 |
| H | 15.6216682269 | 18.7160132509 | 18.5192891699 |
| H | 16.5581173475 | 19.3175107911 | 19.9336516968 |
| C | 17.6450618333 | 13.8288145171 | 20.0335958260 |
| H | 18.6698287550 | 13.9625957738 | 19.6644039668 |
| H | 17.6970247322 | 13.3619512225 | 21.0255291139 |
| H | 17.0721960579 | 13.2009194170 | 19.3356018565 |
| C | 18.5294513693 | 10.3806040376 | 22.6465341970 |
| H | 18.1770270869 | 9.3921675561  | 22.9745423268 |
| H | 19.6005843752 | 10.4937287707 | 22.8620627883 |
| H | 17.9797058573 | 11.1708691258 | 23.1788120007 |

**vase\_5**

|     |                  |               |               |
|-----|------------------|---------------|---------------|
| E = | -1324.4205455153 |               |               |
| C   | 11.4263269100    | 16.8458838141 | 21.9501585663 |
| C   | 10.7978158352    | 15.8435360515 | 21.1931330559 |
| C   | 11.3402396477    | 14.5743658570 | 20.9270332782 |
| C   | 12.6972082754    | 16.5289209429 | 22.4627296676 |
| C   | 13.2553268004    | 15.2655014048 | 22.2613950376 |
| C   | 12.5908794410    | 14.2997127026 | 21.5005737190 |
| C   | 10.6989158892    | 18.1822273321 | 22.1290018629 |
| C   | 11.2041443037    | 19.1991154762 | 21.1046582758 |
| C   | 10.4744889731    | 19.3662815067 | 19.9147155088 |
| C   | 10.8610332880    | 20.1896746640 | 18.8455038743 |
| C   | 9.9358612678     | 20.2937679856 | 17.6305297989 |
| C   | 10.4307712597    | 19.4027109357 | 16.4917406578 |
| C   | 9.9177981188     | 18.0965673901 | 16.4106493186 |
| C   | 10.3154381868    | 17.1281677610 | 15.4751167062 |
| C   | 11.3919241170    | 19.7530736731 | 15.5308315124 |
| C   | 11.8254201354    | 18.8202990284 | 14.5834668097 |
| C   | 11.3162562128    | 17.5203456953 | 14.5671428703 |
| C   | 12.3793235557    | 19.9573177535 | 21.2230703351 |
| C   | 12.8186110918    | 20.7718786662 | 20.1756468999 |
| C   | 12.0881026070    | 20.8632767918 | 18.9877195666 |
| C   | 10.5613330731    | 13.6344344819 | 20.0079076388 |
| C   | 11.0276229639    | 13.7848591983 | 18.5572371993 |
| C   | 9.6503312117     | 15.7498512231 | 15.5420365106 |
| C   | 10.5301341901    | 14.7774154627 | 16.3279375861 |
| C   | 10.2552328661    | 14.5751859209 | 17.6906745094 |
| C   | 12.1765861105    | 13.1893917460 | 18.0028525518 |
| C   | 12.4579531854    | 13.3198699633 | 16.6400468111 |
| C   | 11.6404393295    | 14.0932803065 | 15.8116541187 |
| O   | 12.5036422694    | 21.7601041468 | 17.9997821619 |
| O   | 11.8779162085    | 21.0696125370 | 15.4505449304 |
| C   | 13.2220503440    | 21.2147632969 | 15.7876835348 |
| C   | 13.5576145321    | 21.4642435706 | 17.1405504249 |
| C   | 14.8973856653    | 21.5700804182 | 17.5423758051 |
| C   | 15.8745042098    | 21.4588365086 | 16.5497709637 |

|   |               |               |               |
|---|---------------|---------------|---------------|
| C | 15.5277322958 | 21.3026182979 | 15.1918328498 |
| C | 14.2002695771 | 21.1732820119 | 14.7879459219 |
| O | 13.0698445040 | 19.9861201460 | 22.4470617369 |
| C | 14.3498605494 | 19.4519359437 | 22.4661879664 |
| C | 14.5016983577 | 18.0964809888 | 22.8529214222 |
| C | 15.7719624972 | 17.5061085966 | 22.9260921517 |
| C | 15.4587764457 | 20.2670051243 | 22.2101229944 |
| C | 16.8711002304 | 18.3111686734 | 22.6178686251 |
| C | 16.7172617747 | 19.6722491764 | 22.2897069012 |
| O | 13.3660107628 | 17.4341446444 | 23.3011240029 |
| O | 13.1575752060 | 13.0203020627 | 21.3850510186 |
| C | 14.3240306405 | 12.9554705485 | 20.6278845856 |
| C | 14.2155355106 | 12.6837899440 | 19.2423340068 |
| O | 12.9574960912 | 12.3186861707 | 18.7704303671 |
| C | 15.5690571940 | 13.0822756682 | 21.2528657877 |
| C | 16.6997242292 | 13.0035057153 | 20.4425969230 |
| C | 16.5991151841 | 12.7990458935 | 19.0504898915 |
| C | 15.3590588085 | 12.6159214570 | 18.4312257616 |
| O | 11.8687288951 | 14.0973095921 | 14.4257802690 |
| O | 11.7182360938 | 16.6543741916 | 13.5376977554 |
| C | 12.9713270414 | 16.0555506095 | 13.5686513156 |
| C | 13.0346416442 | 14.6992283995 | 13.9768524882 |
| C | 14.1063460685 | 16.7087201934 | 13.0659751165 |
| C | 15.2857145351 | 15.9651513239 | 12.9775211434 |
| C | 15.3287681232 | 14.6051738406 | 13.3410341818 |
| C | 14.2071061809 | 13.9472750457 | 13.8414766964 |
| N | 16.5663728277 | 16.2833276113 | 12.5239298911 |
| N | 16.6245710544 | 14.1682659495 | 13.0856444627 |
| C | 17.4064381763 | 15.1964275625 | 12.6108893495 |
| N | 16.7203101612 | 21.3070383406 | 14.4776214770 |
| N | 17.2648328099 | 21.5406664564 | 16.5875794234 |
| C | 17.8004864782 | 21.4681536877 | 15.3221414519 |
| N | 17.9996156285 | 20.1800839252 | 22.1032541078 |
| C | 18.9483755858 | 19.1963226589 | 22.2638252134 |
| N | 18.2447528918 | 18.0633245423 | 22.6054179139 |
| N | 18.0562539565 | 13.0797860057 | 20.7338443790 |
| N | 17.9088523719 | 12.7545716187 | 18.5713240051 |
| C | 18.8165455192 | 12.9057020686 | 19.5956202518 |
| H | 9.1551684333  | 17.8100781265 | 17.1382520049 |
| H | 12.5532285035 | 19.1200304230 | 13.8334707612 |
| H | 9.3741838919  | 15.0684112382 | 18.1070621522 |
| H | 13.2994846343 | 12.7775453578 | 16.2162462254 |
| H | 9.8171362185  | 16.0716040984 | 20.7694375901 |
| H | 14.2091896104 | 15.0209088561 | 22.7213401160 |
| H | 9.5383771135  | 18.8126238634 | 19.8140290464 |
| H | 13.7159533737 | 21.3730269158 | 20.2988490439 |
| H | 13.9113643657 | 21.0600401792 | 13.7446921929 |
| H | 15.1530593921 | 21.7673404536 | 18.5812643169 |
| H | 15.3226156434 | 21.3219422768 | 21.9800965615 |
| H | 15.8826546431 | 16.4704003100 | 23.2402588300 |
| H | 14.0465731111 | 17.7439938565 | 12.7369185144 |
| H | 14.2142703455 | 12.8904997358 | 14.1017620122 |
| H | 15.2718536984 | 12.3881598173 | 17.3709745072 |
| H | 15.6285583045 | 13.2082408924 | 22.3321591381 |
| C | 9.5474927426  | 21.7348746128 | 17.2402171716 |
| H | 9.0017450645  | 19.8115832461 | 17.9630312456 |
| H | 8.8252492473  | 21.7130693304 | 16.4106944486 |
| H | 10.4100848897 | 22.3310508298 | 16.9294087950 |

|    |               |               |               |
|----|---------------|---------------|---------------|
| H  | 9.0699388066  | 22.2325777134 | 18.0972203265 |
| C  | 10.5938994377 | 18.6807268888 | 23.5852834313 |
| H  | 11.5693008219 | 18.9128974420 | 24.0216736156 |
| H  | 10.1114725359 | 17.9101184368 | 24.2048072074 |
| H  | 9.9728030613  | 19.5879063020 | 23.6238606677 |
| H  | 9.6648686423  | 17.9693700383 | 21.8114461680 |
| C  | 9.0881452580  | 15.2275940191 | 14.2041785212 |
| H  | 9.8684373621  | 15.0609241753 | 13.4564231647 |
| H  | 8.3678447992  | 15.9537487346 | 13.7989174753 |
| H  | 8.5585616405  | 14.2776576884 | 14.3699076133 |
| H  | 8.7738639775  | 15.9069720247 | 16.1921139562 |
| H  | 9.5383613853  | 14.0456020689 | 20.0048477578 |
| C  | 10.4237510737 | 12.1751246946 | 20.4890373747 |
| H  | 10.0144990722 | 12.1557122018 | 21.5099777925 |
| H  | 9.7264780743  | 11.6360439465 | 19.8307688046 |
| H  | 11.3790911185 | 11.6430120042 | 20.4916326312 |
| Rh | 19.7025513087 | 21.5772719775 | 14.7681531964 |
| I  | 19.3102336359 | 24.2536359576 | 14.5852084049 |
| C  | 21.5409538709 | 21.5670155103 | 13.4885937866 |
| H  | 21.3810046893 | 22.4448999880 | 12.8562360531 |
| C  | 21.9170854680 | 21.8083011749 | 14.8101649548 |
| H  | 22.0479427291 | 22.8558005743 | 15.1001214163 |
| C  | 19.6556547880 | 19.5468417245 | 14.1508122454 |
| H  | 18.6224698466 | 19.1873938172 | 14.1065598711 |
| C  | 20.2319150766 | 19.6028049375 | 15.4501333123 |
| H  | 19.5763980946 | 19.3338881002 | 16.2840807880 |
| C  | 21.7187855757 | 19.4307165262 | 15.7326950448 |
| C  | 20.4164300517 | 19.3635667847 | 12.8563479879 |
| C  | 22.4600234678 | 20.7861134458 | 15.7862708682 |
| C  | 21.6944093560 | 20.2332955636 | 12.7695949347 |
| H  | 21.9354624468 | 20.4231058041 | 11.7121778278 |
| H  | 22.5543526255 | 19.6875875935 | 13.1839237145 |
| H  | 20.6541369620 | 18.2911824137 | 12.7211310992 |
| H  | 19.7416769571 | 19.6335325380 | 12.0269494850 |
| H  | 21.8365703050 | 18.9180387076 | 16.7001638238 |
| H  | 22.1598299561 | 18.7636765615 | 14.9769302523 |
| H  | 22.3532029416 | 21.2041926382 | 16.8001181817 |
| H  | 23.5453592757 | 20.6433304872 | 15.6277122150 |
| Rh | 20.9100361501 | 19.3839966389 | 21.9633136877 |
| I  | 20.3334370908 | 18.8244897782 | 19.3843514520 |
| C  | 21.1332020539 | 20.5802919675 | 23.7096174172 |
| H  | 20.1489326522 | 20.9285852637 | 24.0417690374 |
| C  | 21.4645128484 | 19.2308024538 | 24.0312707866 |
| H  | 20.6931549504 | 18.6602468907 | 24.5577254362 |
| C  | 23.0609647600 | 18.8806440927 | 21.6887044860 |
| H  | 23.0599604836 | 18.2698949140 | 20.7809971193 |
| C  | 22.9282786622 | 20.2586774673 | 21.5250731448 |
| H  | 22.7998428473 | 20.6260866199 | 20.5031064364 |
| C  | 23.5340794051 | 18.1790115606 | 22.9446183600 |
| C  | 22.8906629546 | 18.7276039370 | 24.2430692697 |
| C  | 23.3170723673 | 21.2865089028 | 22.5755636827 |
| C  | 22.1202561392 | 21.7048706732 | 23.4640397598 |
| H  | 23.2837018168 | 17.1115091629 | 22.8417738571 |
| H  | 24.6371321674 | 18.2228911008 | 23.0129865571 |
| H  | 23.5040114396 | 19.5380773836 | 24.6650237125 |
| H  | 22.8839386458 | 17.9313877251 | 25.0032840546 |
| H  | 23.7259404938 | 22.1767578454 | 22.0732007906 |
| H  | 24.1330724960 | 20.8867276335 | 23.1949976808 |

|    |                |               |               |
|----|----------------|---------------|---------------|
| H  | 21.5734216457  | 22.5225943052 | 22.9671531950 |
| H  | 22.4782567510  | 22.1217117636 | 24.4243624354 |
| Rh | 20.7997771491  | 12.8586590551 | 19.5809545155 |
| I  | 20.5607032586  | 10.1953701518 | 20.0320343378 |
| C  | 20.9706202674  | 14.9884873980 | 19.7825577592 |
| H  | 20.0323133024  | 15.4049656009 | 20.1598597288 |
| C  | 20.9700637343  | 14.6265140977 | 18.4063134883 |
| H  | 20.0363248585  | 14.7990770114 | 17.8596225803 |
| C  | 22.8159102594  | 12.9319965156 | 20.4911781756 |
| H  | 22.8358758782  | 12.0266715950 | 21.1055183723 |
| C  | 23.0053060765  | 12.7688217383 | 19.1189782412 |
| H  | 23.1194014722  | 11.7441078956 | 18.7548974288 |
| C  | 22.1834182600  | 14.5595234401 | 17.5056656371 |
| C  | 23.4069928834  | 13.8845999844 | 18.1694818251 |
| C  | 22.9221358567  | 14.2387664662 | 21.2539978924 |
| C  | 22.2097885319  | 15.4217568384 | 20.5557229632 |
| H  | 21.8929800362  | 13.9960416809 | 16.6050826832 |
| H  | 22.4373184882  | 15.5745741365 | 17.1450547760 |
| H  | 24.0621410734  | 13.4727637244 | 17.3859165312 |
| H  | 24.0117555521  | 14.6285609842 | 18.7085318708 |
| H  | 22.8968470319  | 15.9494198563 | 19.8770512098 |
| H  | 21.9096220273  | 16.1721381279 | 21.3045164752 |
| H  | 22.4661125478  | 14.0787056631 | 22.2438752197 |
| H  | 23.9834569294  | 14.4850633213 | 21.4468500344 |
| Rh | 19.3601588165  | 15.1070359547 | 12.2318801152 |
| I  | 19.6517848414  | 15.6946983521 | 14.8504801818 |
| C  | 21.4427389456  | 14.3203174331 | 11.9662119945 |
| H  | 21.68444462390 | 13.9650580305 | 12.9721402271 |
| C  | 21.4539357813  | 15.7001687650 | 11.7656053684 |
| H  | 21.7421096481  | 16.3207947526 | 12.6202566774 |
| C  | 19.0334653015  | 13.8910502814 | 10.5155228523 |
| H  | 18.0099514084  | 13.5000772613 | 10.5373595528 |
| C  | 19.1801283436  | 15.2465135389 | 10.0975034737 |
| H  | 18.2538598092  | 15.7790175349 | 9.8616434231  |
| C  | 21.4988283569  | 13.2914946057 | 10.8481088249 |
| C  | 20.0916362979  | 12.8094373239 | 10.4194475868 |
| C  | 20.4297337796  | 15.8021209979 | 9.4179488027  |
| C  | 21.4433312272  | 16.4026879711 | 10.4241445623 |
| H  | 20.9027089985  | 15.0083997546 | 8.8203397191  |
| H  | 20.1339513992  | 16.5816010309 | 8.6991505835  |
| H  | 19.7796266561  | 11.9825238551 | 11.0779036391 |
| H  | 20.1214395150  | 12.3856699450 | 9.3976542928  |
| H  | 22.0374896973  | 13.7135980731 | 9.9872154037  |
| H  | 22.0928747952  | 12.4274757637 | 11.1840587486 |
| H  | 21.1861747937  | 17.4582412928 | 10.6055169206 |
| H  | 22.4595902570  | 16.4093287728 | 9.9877630999  |
| C  | 18.2853752051  | 12.5045272647 | 17.1856994552 |
| H  | 18.0928084023  | 13.3881461905 | 16.5574754685 |
| H  | 19.3615948173  | 12.2797847017 | 17.1705048753 |
| H  | 17.7339691772  | 11.6314922837 | 16.8076833509 |
| C  | 17.1149132232  | 12.8309868356 | 13.3874420898 |
| H  | 18.1953180740  | 12.8209472051 | 13.1810619877 |
| H  | 16.9534583946  | 12.6043273215 | 14.4511818467 |
| H  | 16.6024332966  | 12.0813741921 | 12.7665805276 |
| C  | 16.8069130609  | 21.3768507073 | 13.0260318160 |
| H  | 16.4419981314  | 22.3521947225 | 12.6708564647 |
| H  | 17.8678567829  | 21.2769503585 | 12.7530419956 |
| H  | 16.2155883161  | 20.5696665422 | 12.5701107196 |



|   |               |               |               |
|---|---------------|---------------|---------------|
| C | 16.9952430196 | 17.6180502486 | 12.1357035359 |
| H | 16.8888935309 | 18.3070242986 | 12.9865903701 |
| H | 18.0573680669 | 17.5589457320 | 11.8569836935 |
| H | 16.4011588294 | 17.9803069800 | 11.2839066930 |
| C | 18.0575413452 | 21.7331258297 | 17.7946186963 |
| H | 17.9652938274 | 20.8641952802 | 18.4631466273 |
| H | 19.1090407639 | 21.8322561841 | 17.4879868205 |
| H | 17.7427557936 | 22.6561808000 | 18.3032848829 |
| C | 18.2904281722 | 21.5488933944 | 21.7012502862 |
| H | 17.9784352750 | 22.2552524454 | 22.4842510138 |
| H | 19.3755691783 | 21.6220260425 | 21.5358789466 |
| H | 17.7697751120 | 21.7829388763 | 20.7613006776 |
| C | 18.8474248455 | 16.7477844101 | 22.7605831124 |
| H | 19.9392640423 | 16.8805540773 | 22.7688926227 |
| H | 18.5192957337 | 16.2876468581 | 23.7038483517 |
| H | 18.5736431626 | 16.1027624110 | 21.9119842486 |
| C | 18.6133998262 | 13.1023356425 | 22.0792455400 |
| H | 18.5705153346 | 12.0981988687 | 22.5281322358 |
| H | 19.6677090826 | 13.4061061685 | 21.9944085380 |
| H | 18.0581103061 | 13.8180807000 | 22.7010215182 |

**3 arms up 1 down**

|     |                  |               |               |
|-----|------------------|---------------|---------------|
| E = | -1324.3942694164 |               |               |
| C   | 11.6284964836    | 17.4201603788 | 21.0006601788 |
| C   | 10.9182358226    | 16.5907715340 | 20.1144351806 |
| C   | 11.1031153712    | 15.2030630122 | 19.9806813430 |
| C   | 12.5487422832    | 16.7788085211 | 21.8441844781 |
| C   | 12.7728485099    | 15.4053056931 | 21.7457713976 |
| C   | 12.0948774092    | 14.6309477922 | 20.8005506176 |
| C   | 11.4387585253    | 18.9373111441 | 20.8977024749 |
| C   | 12.5373358111    | 19.4600006467 | 19.9679522477 |
| C   | 12.2386243911    | 19.5994115705 | 18.6063376039 |
| C   | 13.1595792055    | 19.8567300659 | 17.5707469423 |
| C   | 12.5383906009    | 19.9245827915 | 16.1655340110 |
| C   | 12.8657648581    | 18.7555877541 | 15.2198526026 |
| C   | 11.7779197955    | 17.8898264319 | 14.9821160336 |
| C   | 11.7914914574    | 16.7266696176 | 14.2034709033 |
| C   | 14.0688290382    | 18.3843049322 | 14.5779462383 |
| C   | 14.1237459528    | 17.2420937582 | 13.7641585744 |
| C   | 13.0124130299    | 16.4223723806 | 13.5797281150 |
| C   | 13.8807710693    | 19.6596109464 | 20.3233568057 |
| C   | 14.8438933189    | 19.9013292199 | 19.3452780578 |
| C   | 14.5040889006    | 19.9709810595 | 17.9875596992 |
| C   | 10.1650281048    | 14.4384587036 | 19.0395584134 |
| C   | 10.7268374436    | 14.1025406163 | 17.6539845813 |
| C   | 10.5486681002    | 15.8332814005 | 14.2154265745 |
| C   | 10.7963427327    | 14.7215489058 | 15.2378239826 |
| C   | 10.4048310448    | 14.9404161764 | 16.5720965120 |
| C   | 11.4961104217    | 12.9665226166 | 17.3445731364 |
| C   | 11.8180705348    | 12.6584465911 | 16.0219115654 |
| C   | 11.4930524509    | 13.5310070951 | 14.9833772048 |
| O   | 15.6177174659    | 20.0776868325 | 17.1524371978 |
| O   | 15.3125077787    | 19.0073912424 | 14.6904669761 |
| C   | 15.4009603880    | 20.3844987467 | 14.7923912915 |
| C   | 15.5700999623    | 20.9431299051 | 16.0734126463 |
| C   | 15.7262627104    | 22.3214901330 | 16.2592162102 |
| C   | 15.6839800569    | 23.1167898762 | 15.1143533798 |
| C   | 15.5090495986    | 22.5575753466 | 13.8295872384 |
| C   | 15.3782539531    | 21.1814667888 | 13.6415881864 |

|   |               |               |                |
|---|---------------|---------------|----------------|
| O | 14.2358241360 | 19.7096833455 | 21.6783502781  |
| C | 15.1210498619 | 18.7731283533 | 22.19274449780 |
| C | 14.5739045076 | 17.6223802602 | 22.8144537254  |
| C | 15.3895360217 | 16.7050677267 | 23.4901751032  |
| C | 16.4951415023 | 19.0396479111 | 22.2368980669  |
| C | 16.7600744891 | 16.9698568176 | 23.5177527337  |
| C | 17.3022345662 | 18.1165895296 | 22.9039398702  |
| O | 13.1920616777 | 17.5055757050 | 22.8591348260  |
| O | 12.3786863182 | 13.2589456739 | 20.7559415937  |
| C | 13.4953025734 | 12.9158340784 | 19.9859915216  |
| C | 13.2602546477 | 12.3119876808 | 18.7332272043  |
| O | 11.9315646879 | 12.0956081945 | 18.3526312212  |
| C | 14.8001628842 | 13.1446967329 | 20.4505535141  |
| C | 15.8515035479 | 12.8027006007 | 19.5996502484  |
| C | 15.6094412109 | 12.2254070589 | 18.3360904727  |
| C | 14.3196278449 | 11.9440802358 | 17.8949366954  |
| O | 11.8288412075 | 13.1649662128 | 13.6674363075  |
| O | 13.0717883085 | 15.3607673115 | 12.6675276463  |
| C | 13.8484452005 | 14.2347145584 | 12.9014079850  |
| C | 13.1838689113 | 13.0729583263 | 13.3717221612  |
| C | 15.1899388813 | 14.1856865423 | 12.4970871383  |
| C | 15.8334544232 | 12.9475161480 | 12.5571462796  |
| C | 15.1612077885 | 11.7872246952 | 12.9918795428  |
| C | 13.8301779238 | 11.8305403610 | 13.4121333183  |
| N | 17.0977720610 | 12.5310594047 | 12.1423732006  |
| N | 16.0501885112 | 10.7293361056 | 12.8150475958  |
| C | 17.2371326404 | 11.1654950717 | 12.2661326630  |
| N | 15.4618074810 | 23.6292634522 | 12.9409959801  |
| N | 15.7415494915 | 24.4960592029 | 14.9345511137  |
| C | 15.5627249974 | 24.8279928693 | 13.6107336122  |
| N | 18.6678404667 | 18.0965132133 | 23.1762365095  |
| C | 19.0070445585 | 16.9930322352 | 23.9257314983  |
| N | 17.8256305430 | 16.3144637576 | 24.1310369886  |
| N | 17.2341514644 | 12.9265592317 | 19.7098378400  |
| N | 16.8482887141 | 12.0477049790 | 17.7377295739  |
| C | 17.8631249348 | 12.4595033257 | 18.5745422777  |
| H | 10.8374091233 | 18.1329769587 | 15.4812228068  |
| H | 15.0642451740 | 17.0163863731 | 13.2665915318  |
| H | 9.8284530060  | 15.8433899375 | 16.7858863166  |
| H | 12.3363427335 | 11.7290401717 | 15.8022928307  |
| H | 10.1712273696 | 17.0636560389 | 19.4726042796  |
| H | 13.4721667015 | 14.9208147339 | 22.4223495220  |
| H | 11.1963731384 | 19.4524980727 | 18.3143593639  |
| H | 15.8881518475 | 20.0364937185 | 19.6199816518  |
| H | 15.2233474447 | 20.7265908677 | 12.6644064332  |
| H | 15.8303362407 | 22.7302018806 | 17.2631236880  |
| H | 16.8912597402 | 19.9541325653 | 21.7985388345  |
| H | 14.9486207604 | 15.8540722344 | 24.0068423697  |
| H | 15.6756059962 | 15.0723049114 | 12.0936804919  |
| H | 13.2820323859 | 10.9392292172 | 13.7146049775  |
| H | 14.1362155502 | 11.4785717691 | 16.9301654953  |
| H | 14.9717547166 | 13.5966852134 | 21.4245904940  |
| C | 12.4331721576 | 21.3315994495 | 15.5256654167  |
| H | 11.4836923927 | 19.7117507473 | 16.3964717683  |
| H | 11.7855485274 | 21.2746052311 | 14.6374329050  |
| H | 13.3784946247 | 21.7799169751 | 15.2167499989  |
| H | 11.9596818192 | 22.0187899904 | 16.2433849397  |
| C | 11.2297634244 | 19.7021152434 | 22.2185174862  |
| H | 12.1073660175 | 19.6681629000 | 22.8695215245  |
| H | 10.3767738291 | 19.2735047817 | 22.7651941315  |
| H | 11.0007167994 | 20.7560389447 | 22.0013720636  |

|    |               |               |               |
|----|---------------|---------------|---------------|
| H  | 10.5052502543 | 19.0624573078 | 20.3242441455 |
| C  | 10.0080562802 | 15.4068174838 | 12.8372199205 |
| H  | 10.7275683813 | 14.8119366707 | 12.2679121876 |
| H  | 9.7550717218  | 16.3014830007 | 12.2485624672 |
| H  | 9.0917670760  | 14.8110032868 | 12.9645466649 |
| H  | 9.7620313459  | 16.4581805569 | 14.6696608810 |
| H  | 9.3662135345  | 15.1670476662 | 18.8238684577 |
| C  | 9.4671246733  | 13.2414762957 | 19.7241876693 |
| H  | 8.9536985120  | 13.5817851233 | 20.6354468316 |
| H  | 8.7154139357  | 12.8097724330 | 19.0470494250 |
| H  | 10.1774240005 | 12.4546708658 | 19.9991337769 |
| Rh | 15.3395859106 | 26.6607165447 | 12.8694891333 |
| I  | 12.7116613185 | 26.2753603238 | 13.3941464423 |
| C  | 15.0023366662 | 28.4164047919 | 11.5119839759 |
| H  | 13.9966206615 | 28.2221611960 | 11.1288776948 |
| C  | 15.0962245940 | 28.8643889859 | 12.8296966279 |
| H  | 14.1556288941 | 29.0184368066 | 13.3679620654 |
| C  | 17.1468402061 | 26.5581942879 | 11.7510050976 |
| H  | 17.4688901661 | 25.5139546147 | 11.6701470804 |
| C  | 17.4133952536 | 27.2039049471 | 12.9946729320 |
| H  | 17.8903811616 | 26.5862110088 | 13.7613356353 |
| C  | 17.6341398004 | 28.7064197034 | 13.1540881714 |
| C  | 16.9805323581 | 27.2454365498 | 10.4096691620 |
| C  | 16.3239071129 | 29.4639942320 | 13.4844672436 |
| C  | 16.1148442358 | 28.5272781680 | 10.4814024342 |
| H  | 15.6699515042 | 28.7213455058 | 9.4931470278  |
| H  | 16.7419431480 | 29.4013522641 | 10.7075065507 |
| H  | 17.9681594244 | 27.4691157005 | 9.9636947617  |
| H  | 16.4987474691 | 26.5261458008 | 9.7279390140  |
| H  | 18.3647184056 | 28.8809630722 | 13.9590375284 |
| H  | 18.0950531123 | 29.1102836735 | 12.2404574249 |
| H  | 16.1614723881 | 29.4374006442 | 14.5735963306 |
| H  | 16.4173788651 | 30.5333721530 | 13.2180593365 |
| Rh | 20.8105154443 | 16.4785588629 | 24.5894469898 |
| I  | 21.1588197057 | 15.2937582504 | 22.1955871371 |
| C  | 20.8527629933 | 18.0905898024 | 25.9750791417 |
| H  | 20.1036789688 | 18.8368017108 | 25.6864943330 |
| C  | 20.3628718703 | 16.9313680831 | 26.6448218091 |
| H  | 19.2793421184 | 16.8808314289 | 26.7867145449 |
| C  | 22.3795811152 | 15.2358052476 | 25.5475920253 |
| H  | 22.4518069524 | 14.3735774375 | 24.8773565140 |
| C  | 22.9935920302 | 16.4140116262 | 25.1244978872 |
| H  | 23.4720522711 | 16.3937297507 | 24.1412742774 |
| C  | 21.9141802375 | 14.9249169294 | 26.9546919962 |
| C  | 21.1769364236 | 16.1039621148 | 27.6364079904 |
| C  | 23.3609698966 | 17.5736380713 | 26.0363183735 |
| C  | 22.2547374307 | 18.6565578236 | 26.0883330123 |
| H  | 21.2296194791 | 14.0646339239 | 26.8908790015 |
| H  | 22.7664213913 | 14.5894862992 | 27.5745707054 |
| H  | 21.8902445152 | 16.7558567361 | 28.1623091237 |
| H  | 20.5055083673 | 15.7075686122 | 28.4136033381 |
| H  | 24.2969391649 | 18.0291463783 | 25.6774028217 |
| H  | 23.5752297108 | 17.1975677353 | 27.0461928033 |
| H  | 22.3970444154 | 19.3551352259 | 25.2481969734 |
| H  | 22.3520726694 | 19.2655129095 | 27.0074994227 |
| Rh | 19.8030087671 | 12.3412115027 | 18.1631457936 |
| I  | 19.6177307892 | 9.8056024206  | 19.1063442630 |
| C  | 20.1592113762 | 14.4555360050 | 18.0488980190 |
| H  | 19.4444978580 | 14.9596168269 | 18.7073178801 |
| C  | 19.6553749928 | 13.9765609302 | 16.8034912484 |
| H  | 18.5987825788 | 14.1790701242 | 16.5938999393 |

|    |               |               |               |
|----|---------------|---------------|---------------|
| C  | 22.0235747885 | 12.3146715078 | 18.3292803887 |
| H  | 22.2036979312 | 11.4773254968 | 19.0121176160 |
| C  | 21.6878739168 | 12.0005937009 | 17.0127853293 |
| H  | 21.5977750182 | 10.9399702535 | 16.7590104683 |
| C  | 20.4815809610 | 13.7221709671 | 15.5584974341 |
| C  | 21.8021190079 | 12.9645679824 | 15.8412355476 |
| C  | 22.4698531336 | 13.6716080738 | 18.8274588820 |
| C  | 21.6182954390 | 14.8428287983 | 18.2769830365 |
| H  | 19.8723807209 | 13.1092784622 | 14.8730806715 |
| H  | 20.6891804862 | 14.6733771202 | 15.0312674527 |
| H  | 22.0810781263 | 12.3913535637 | 14.9428429610 |
| H  | 22.6219857098 | 13.6732543909 | 16.0301721401 |
| H  | 22.0444861223 | 15.2220977040 | 17.3354587858 |
| H  | 21.6596725154 | 15.6759967979 | 18.9957550833 |
| H  | 22.3958091529 | 13.6667982821 | 19.9266457981 |
| H  | 23.5392169399 | 13.8341252288 | 18.5968387646 |
| Rh | 18.7358348924 | 10.0443659541 | 11.5830346153 |
| I  | 19.8071972873 | 10.0405399892 | 14.0472025551 |
| C  | 20.0085764909 | 8.3174854746  | 10.9028270079 |
| H  | 20.2348923971 | 7.8146803917  | 11.8468749451 |
| C  | 20.6822425023 | 9.5118427381  | 10.6504057130 |
| H  | 21.4095582646 | 9.8353708855  | 11.4015466770 |
| C  | 17.4849793413 | 9.3036054754  | 10.0295767557 |
| H  | 16.4356734838 | 9.4964159100  | 10.2792849975 |
| C  | 18.2237525712 | 10.4139356017 | 9.5230499426  |
| H  | 17.6803605117 | 11.3614027842 | 9.4582556194  |
| C  | 19.2845629776 | 7.4916421917  | 9.8516776896  |
| C  | 17.7787876292 | 7.8403873003  | 9.7655862339  |
| C  | 19.4098034100 | 10.2919852141 | 8.5702274915  |
| C  | 20.7631441740 | 10.2281723401 | 9.3184252649  |
| H  | 19.2795413249 | 9.4063487868  | 7.9307061489  |
| H  | 19.4161482858 | 11.1548920048 | 7.8859969252  |
| H  | 17.2336908959 | 7.2539657656  | 10.5229144880 |
| H  | 17.3631320386 | 7.5316784450  | 8.7874035513  |
| H  | 19.7670817935 | 7.6287523514  | 8.8732014427  |
| H  | 19.3957347658 | 6.4246110850  | 10.0967892767 |
| H  | 21.1116601185 | 11.2538008533 | 9.5165256483  |
| H  | 21.5371606977 | 9.7628894846  | 8.6796952042  |
| C  | 17.0514245114 | 11.4126597914 | 16.4426682219 |
| H  | 16.4258304594 | 11.9019342500 | 15.6815272541 |
| H  | 18.1118584734 | 11.5076322394 | 16.1712836334 |
| H  | 16.8138296595 | 10.3396920354 | 16.5020971394 |
| C  | 15.7752025720 | 9.3461773688  | 13.1818303257 |
| H  | 16.6962110752 | 8.7698905812  | 13.0115078854 |
| H  | 15.5060753966 | 9.2880353041  | 14.2467439248 |
| H  | 14.9568786371 | 8.9374721081  | 12.5709206289 |
| C  | 15.1494491002 | 23.5059685640 | 11.5235951306 |
| H  | 14.1428080036 | 23.0812355053 | 11.3965068736 |
| H  | 15.1623376655 | 24.5164272708 | 11.0919314271 |
| H  | 15.8925017781 | 22.8688172939 | 11.0227438050 |
| C  | 18.1483445374 | 13.4190564953 | 11.6616838062 |
| H  | 18.4812308279 | 14.0876261130 | 12.4702806855 |
| H  | 18.9900460807 | 12.7867679257 | 11.3422472858 |
| H  | 17.7837344784 | 14.0149007964 | 10.8120574619 |
| C  | 15.7910067156 | 25.4677222964 | 16.0188103045 |
| H  | 16.6284267671 | 25.2377660308 | 16.6922634932 |
| H  | 15.9291257246 | 26.4606834880 | 15.5660520307 |
| H  | 14.8421435468 | 25.4615792130 | 16.5761221921 |
| C  | 19.6290588010 | 19.0598177330 | 22.6561620485 |
| H  | 19.4069667127 | 20.0684583118 | 23.0341793982 |
| H  | 20.6271873377 | 18.7416631391 | 22.9910257512 |

|   |               |               |               |
|---|---------------|---------------|---------------|
| H | 19.6044544427 | 19.0573787095 | 21.5565490276 |
| C | 17.7244087715 | 15.0351190176 | 24.8193273655 |
| H | 18.7211286355 | 14.7989207421 | 25.2209744669 |
| H | 16.9932305447 | 15.0980700887 | 25.6382403888 |
| H | 17.4254095203 | 14.2452719157 | 24.1139639625 |
| C | 17.9348943779 | 13.4045794848 | 20.8940967309 |
| H | 17.7236366699 | 12.7457346670 | 21.7495319323 |
| H | 19.0136572011 | 13.3762491620 | 20.6849906660 |
| H | 17.6411467283 | 14.4378604515 | 21.1305704749 |

**2 side arms up 2 down (a)**

|     |                  |               |               |
|-----|------------------|---------------|---------------|
| E = | -1324.3808702194 |               |               |
| C   | 12.7444640758    | 15.2371601924 | 18.3134877074 |
| C   | 11.9996264292    | 14.4950472138 | 17.3704287228 |
| C   | 12.0768105552    | 13.1189225293 | 17.1314696071 |
| C   | 13.5975840702    | 14.4690116733 | 19.1378088350 |
| C   | 13.7395334875    | 13.0917438504 | 18.9006324685 |
| C   | 13.0401399690    | 12.4337082755 | 17.8926851702 |
| C   | 12.5484945000    | 16.7550234127 | 18.1844885739 |
| C   | 13.6428018786    | 17.3545885954 | 17.2967858801 |
| C   | 13.2646300320    | 17.8507783700 | 16.0444967630 |
| C   | 14.1106867150    | 18.3412626623 | 15.0235034172 |
| C   | 13.3812966296    | 18.5376821352 | 13.6805939046 |
| C   | 13.6320107511    | 17.3738506434 | 12.7061602003 |
| C   | 12.5309365148    | 16.5476411869 | 12.4051109973 |
| C   | 12.5706493471    | 15.4055857244 | 11.5902458871 |
| C   | 14.8579684837    | 16.9643506426 | 12.1450527916 |
| C   | 14.9369171843    | 15.8755831756 | 11.2696823194 |
| C   | 13.8030458538    | 15.1184120492 | 10.9776943781 |
| C   | 15.0323486861    | 17.3206193552 | 17.5186327909 |
| C   | 15.9147826010    | 17.8801061904 | 16.6015671611 |
| C   | 15.4775891045    | 18.4248493697 | 15.3818639372 |
| C   | 11.0761451236    | 12.5016907630 | 16.1513800792 |
| C   | 11.5855217465    | 12.3264081247 | 14.7199859346 |
| C   | 11.3479420595    | 14.4847555723 | 11.5320124504 |
| C   | 11.6300725375    | 13.2503021510 | 12.3994870426 |
| C   | 11.2746806335    | 13.3064186896 | 13.7614939241 |
| C   | 12.3114305379    | 11.2154605589 | 14.2583297599 |
| C   | 12.6001882587    | 11.0715343828 | 12.9009642029 |
| C   | 12.2835335506    | 12.0775299712 | 11.9856643234 |
| O   | 16.5483355925    | 19.0213128011 | 14.7131142748 |
| O   | 16.0879934117    | 17.5400342307 | 12.4692025548 |
| C   | 16.2089565939    | 18.9116900058 | 12.3233715904 |
| C   | 16.4401895297    | 19.6589328951 | 13.4943695703 |
| C   | 16.6476587043    | 21.0421663373 | 13.4505662495 |
| C   | 16.5660086924    | 21.6509298641 | 12.1991392803 |
| C   | 16.2941187317    | 20.9081965772 | 11.0299485731 |
| C   | 16.1264707221    | 19.5234253549 | 11.0666997557 |
| O   | 15.6114256847    | 16.6466776502 | 18.5959362229 |
| C   | 15.2356899740    | 17.0601729511 | 19.8645157343 |
| C   | 14.5812176335    | 16.1247244367 | 20.6924041795 |
| C   | 14.2446796950    | 16.4393853915 | 22.0159047808 |
| C   | 15.5186914139    | 18.3583140903 | 20.3080406601 |
| C   | 14.5325866682    | 17.7295480482 | 22.4555560511 |
| C   | 15.1432736003    | 18.6809215098 | 21.6114792053 |
| O   | 14.3177399830    | 14.8367394468 | 20.2773877215 |
| O   | 13.2942126488    | 11.0677737297 | 17.6913623909 |
| C   | 14.3651620058    | 10.8190646541 | 16.8261451295 |
| C   | 14.0763919358    | 10.3569860513 | 15.5233984951 |
| O   | 12.7354828698    | 10.2152401130 | 15.1476588337 |
| C   | 15.6886797211    | 11.0296128439 | 17.2445760615 |

|    |               |               |               |
|----|---------------|---------------|---------------|
| C  | 16.7002804589 | 10.8065361757 | 16.3115841864 |
| C  | 16.4068399320 | 10.3307384289 | 15.0184014903 |
| C  | 15.1020137252 | 10.0729790604 | 14.6124650388 |
| O  | 12.5906611656 | 11.8460038295 | 10.6302628290 |
| O  | 13.8297766661 | 14.1411194077 | 9.9800829569  |
| C  | 14.6175435632 | 13.0031404095 | 10.0355404483 |
| C  | 13.9429534327 | 11.7873340898 | 10.3165561867 |
| C  | 15.9569432018 | 13.0114581306 | 9.6232975498  |
| C  | 16.5895979285 | 11.7732300114 | 9.4857107644  |
| C  | 15.9095701777 | 10.5640010841 | 9.7339708053  |
| C  | 14.5789160296 | 10.5491929379 | 10.1603782111 |
| N  | 17.8530604046 | 11.4203633186 | 9.0148590004  |
| N  | 16.7965260447 | 9.5418983986  | 9.4025207969  |
| C  | 17.9888153013 | 10.0508001600 | 8.9326736501  |
| N  | 16.2166709275 | 21.8333275462 | 9.9912172068  |
| N  | 16.6500315535 | 22.9835014727 | 11.8063167736 |
| C  | 16.3951939203 | 23.1156848213 | 10.4601781333 |
| N  | 15.2300418927 | 19.8586635787 | 22.3513292266 |
| C  | 14.7079839495 | 19.6872909631 | 23.6140713701 |
| N  | 14.2854829969 | 18.3781197770 | 23.6619486469 |
| N  | 18.0798420078 | 10.9988303168 | 16.3481293332 |
| N  | 17.6151921732 | 10.2557518789 | 14.3390587099 |
| C  | 18.6548790465 | 10.6723993399 | 15.1383801021 |
| H  | 11.5765080963 | 16.7925199250 | 12.8769936918 |
| H  | 15.9010180879 | 15.6382534998 | 10.8247998052 |
| H  | 10.7322887256 | 14.1910659821 | 14.1033537512 |
| H  | 13.0848923971 | 10.1644750266 | 12.5486324373 |
| H  | 11.2910892764 | 15.0580364409 | 16.7587584348 |
| H  | 14.4128801470 | 12.5281679838 | 19.5432383253 |
| H  | 12.1991465496 | 17.8058551712 | 15.8091100196 |
| H  | 16.9802306252 | 17.8874618418 | 16.8249152835 |
| H  | 15.9060325348 | 18.9288363362 | 10.1809652163 |
| H  | 16.8165193645 | 21.5958831207 | 14.3724930354 |
| H  | 15.9995067786 | 19.0675065552 | 19.6354268988 |
| H  | 13.7461026764 | 15.6968127877 | 22.6363747075 |
| H  | 16.4488356060 | 13.9449769512 | 9.3568105208  |
| H  | 14.0254407164 | 9.6260007639  | 10.3258666179 |
| H  | 14.8778153867 | 9.7100738860  | 13.6129662067 |
| H  | 15.8971896637 | 11.3909281711 | 18.2492665573 |
| C  | 13.2926641464 | 19.9561742494 | 13.0703588816 |
| H  | 12.3358461654 | 18.3549624369 | 13.9738285950 |
| H  | 12.5467827139 | 19.9520552709 | 12.2608505033 |
| H  | 14.2209269997 | 20.3529751157 | 12.6571819487 |
| H  | 12.9440121378 | 20.6575847421 | 13.8433652636 |
| C  | 12.1120736626 | 17.5817055662 | 19.4170100205 |
| H  | 12.9039932314 | 17.8040678884 | 20.1351105070 |
| H  | 11.3099519275 | 17.0489000585 | 19.9495017270 |
| H  | 11.7044876569 | 18.5431567663 | 19.0687682878 |
| H  | 11.6593097938 | 16.8129031179 | 17.5373614192 |
| C  | 10.7760110452 | 14.2170897432 | 10.1259442494 |
| H  | 11.4916372840 | 13.7120143679 | 9.4712413595  |
| H  | 10.4885220497 | 15.1701870479 | 9.6579951456  |
| H  | 9.8759899212  | 13.5887092022 | 10.2014282101 |
| H  | 10.5624989618 | 15.0310138909 | 12.0803447279 |
| H  | 10.2962384325 | 13.2754465473 | 16.0566067497 |
| C  | 10.3614635416 | 11.2526146540 | 16.7137051798 |
| H  | 9.8848478075  | 11.4996611788 | 17.6737578027 |
| H  | 9.5783628566  | 10.9218633149 | 16.0156003616 |
| H  | 11.0546662663 | 10.4208059646 | 16.8755520102 |
| Rh | 16.1988193250 | 24.8228871793 | 9.4619740168  |
| I  | 13.5773808017 | 24.6228144723 | 10.1053768673 |

|    |               |               |               |
|----|---------------|---------------|---------------|
| C  | 15.8846546801 | 26.3888281844 | 7.8808249215  |
| H  | 14.8609362905 | 26.1841968570 | 7.5553285235  |
| C  | 16.0376631238 | 27.0093885346 | 9.1200064312  |
| H  | 15.1216069618 | 27.2741667097 | 9.6569430214  |
| C  | 17.9644804489 | 24.4941207615 | 8.3231947231  |
| H  | 18.2432763928 | 23.4359126293 | 8.3798464070  |
| C  | 18.2942321016 | 25.2932546130 | 9.4579733464  |
| H  | 18.7723380833 | 24.7685442953 | 10.2904789069 |
| C  | 18.5763476049 | 26.7927927807 | 9.4001971654  |
| C  | 17.7845122426 | 24.9964503954 | 6.9039291379  |
| C  | 17.3068629232 | 27.6448220390 | 9.6492852571  |
| C  | 16.9681968658 | 26.3095816869 | 6.8171954751  |
| H  | 16.5010754792 | 26.3815340240 | 5.8228199926  |
| H  | 17.6331195158 | 27.1808289954 | 6.9023376247  |
| H  | 18.7664045941 | 25.1178313848 | 6.4082003062  |
| H  | 17.2570885100 | 24.2101443574 | 6.3399206061  |
| H  | 19.3345073045 | 27.0477074354 | 10.1566900342 |
| H  | 19.0272327044 | 27.0453194512 | 8.4290618819  |
| H  | 17.1767069476 | 27.7858050577 | 10.7337138095 |
| H  | 17.4326808273 | 28.6588479284 | 9.2255025180  |
| Rh | 14.5305528659 | 21.0421344000 | 25.0586294879 |
| I  | 17.0259619200 | 20.3357740143 | 25.8024639675 |
| C  | 13.0434718876 | 22.0989610068 | 23.9640774064 |
| H  | 13.0787206257 | 21.7952769639 | 22.9116783895 |
| C  | 12.3962725982 | 21.1952954995 | 24.8583263808 |
| H  | 12.0185629861 | 20.2699967253 | 24.4128983775 |
| C  | 14.0747961597 | 21.8953991886 | 27.0568421250 |
| H  | 14.8228109486 | 21.4220370623 | 27.7005464788 |
| C  | 14.5111645009 | 22.9463183457 | 26.2509945919 |
| H  | 15.5747202136 | 23.1960150278 | 26.3003318996 |
| C  | 12.6333798768 | 21.5584379097 | 27.3788210468 |
| C  | 11.6945575400 | 21.6157799929 | 26.1479332385 |
| C  | 13.5965813640 | 23.9788579632 | 25.6110570067 |
| C  | 13.1932782936 | 23.5939317277 | 24.1661714644 |
| H  | 12.6188317116 | 20.5384045785 | 27.7938493678 |
| H  | 12.2568183867 | 22.2178164387 | 28.1830205473 |
| H  | 11.2770348498 | 22.6265111035 | 26.0272420657 |
| H  | 10.8314677085 | 20.9547691915 | 26.3223670453 |
| H  | 14.1090118128 | 24.9534200529 | 25.5969984723 |
| H  | 12.7016100869 | 24.1169430848 | 26.2343486436 |
| H  | 13.9738211642 | 23.9443803695 | 23.4715878428 |
| H  | 12.2660084075 | 24.1203555913 | 23.8697865471 |
| Rh | 20.5579192316 | 10.8365715662 | 14.5988610968 |
| I  | 20.8490543422 | 8.3043955972  | 15.4921122061 |
| C  | 20.5243209844 | 12.9813341488 | 14.5097294472 |
| H  | 19.7459333735 | 13.3485134609 | 15.1853865742 |
| C  | 20.0766724173 | 12.4323529859 | 13.2717806505 |
| H  | 18.9949722200 | 12.4490337614 | 13.0966641130 |
| C  | 22.7482670466 | 11.2005207716 | 14.6989460023 |
| H  | 23.1012734760 | 10.3963041762 | 15.3514497743 |
| C  | 22.4425831398 | 10.8556437048 | 13.3828699305 |
| H  | 22.5387279043 | 9.8008234144  | 13.1097300906 |
| C  | 20.8919845936 | 12.3355502372 | 11.9987661300 |
| C  | 22.3404854140 | 11.8389053800 | 12.2275400403 |
| C  | 22.9479531612 | 12.6042498749 | 15.2320086162 |
| C  | 21.8988138396 | 13.6163631196 | 14.7095108277 |
| H  | 20.3856173115 | 11.6139963921 | 11.3366544714 |
| H  | 20.8979932441 | 13.3072005983 | 11.4677971891 |
| H  | 22.6906735390 | 11.3383456795 | 11.3111407413 |
| H  | 23.0184124109 | 12.6867529755 | 12.4028492171 |
| H  | 22.2358941132 | 14.0662798063 | 13.7636772294 |

|    |               |               |               |
|----|---------------|---------------|---------------|
| H  | 21.8133748812 | 14.4493505077 | 15.4246628579 |
| H  | 22.8777305839 | 12.5513620344 | 16.3298768016 |
| H  | 23.9717106614 | 12.9594904551 | 15.0098847792 |
| Rh | 19.4948845492 | 9.0482655802  | 8.0964037081  |
| I  | 20.5365302350 | 8.5910665702  | 10.5336605660 |
| C  | 20.7896787077 | 7.4800685302  | 7.1306262980  |
| H  | 20.9999818797 | 6.8085298121  | 7.9674786047  |
| C  | 21.4615571335 | 8.7019610355  | 7.1236781690  |
| H  | 22.1711998367 | 8.8775918117  | 7.9380824367  |
| C  | 18.2796170916 | 8.6079291277  | 6.4046881027  |
| H  | 17.2248411062 | 8.7484124673  | 6.6665804850  |
| C  | 19.0218293686 | 9.7939353722  | 6.1294777865  |
| H  | 18.4719999380 | 10.7344818660 | 6.2288180466  |
| C  | 20.0936563426 | 6.8677515193  | 5.9260447721  |
| C  | 18.5872532908 | 7.2201082506  | 5.8788232885  |
| C  | 20.2306990714 | 9.8582702096  | 5.1989711407  |
| C  | 21.5665374721 | 9.6597558947  | 5.9554958002  |
| H  | 20.1225315401 | 9.1089468397  | 4.4007766171  |
| H  | 20.2460362799 | 10.8350321804 | 4.6909452173  |
| H  | 18.0320936703 | 6.5012968177  | 6.5029245179  |
| H  | 18.1920123766 | 7.0997330816  | 4.8522354881  |
| H  | 20.5944772771 | 7.1938122279  | 5.0034969655  |
| H  | 20.2093328319 | 5.7735711063  | 5.9638063308  |
| H  | 21.8993309817 | 10.6304281275 | 6.3555667196  |
| H  | 22.3614575039 | 9.3295600771  | 5.2606515866  |
| C  | 17.7620866016 | 9.7597948847  | 12.9785143041 |
| H  | 17.1499020110 | 10.3575467520 | 12.2870675938 |
| H  | 18.8208661672 | 9.8277926394  | 12.6924300144 |
| H  | 17.4628252930 | 8.7026772517  | 12.9275872348 |
| C  | 16.5136812528 | 8.1203459456  | 9.5546052650  |
| H  | 17.4444326050 | 7.5733573188  | 9.3444168615  |
| H  | 16.1982058597 | 7.9115537743  | 10.5874792381 |
| H  | 15.7249637956 | 7.8031468584  | 8.8563359298  |
| C  | 15.8139340560 | 21.5101545381 | 8.6289616779  |
| H  | 14.7977041513 | 21.0884105861 | 8.6284549355  |
| H  | 15.8072554656 | 22.4484854462 | 8.0556426019  |
| H  | 16.5188547621 | 20.7956156000 | 8.1799826459  |
| C  | 18.8960249434 | 12.3717746374 | 8.6542125417  |
| H  | 19.1551026932 | 12.9946291131 | 9.5229952295  |
| H  | 19.7771373352 | 11.7883979979 | 8.3472058122  |
| H  | 18.5639554933 | 13.0099489879 | 7.8219461315  |
| C  | 16.7897326014 | 24.1051662502 | 12.7255286455 |
| H  | 17.6798009736 | 23.9681671822 | 13.3559863068 |
| H  | 16.8893180123 | 25.0169812657 | 12.1184907756 |
| H  | 15.8909144439 | 24.1940067775 | 13.3538455460 |
| C  | 15.8661098401 | 21.0842010339 | 21.8866498521 |
| H  | 15.3524027931 | 21.4676669067 | 20.9930502136 |
| H  | 15.8037230927 | 21.8177723080 | 22.7036123060 |
| H  | 16.9252416622 | 20.8952392605 | 21.6580336415 |
| C  | 13.7368179187 | 17.7347059863 | 24.8480533273 |
| H  | 13.6247037446 | 18.5111667110 | 25.6192765385 |
| H  | 12.7599790755 | 17.2843406483 | 24.6199775050 |
| H  | 14.4290994931 | 16.9615226897 | 25.2124933573 |
| C  | 18.8296678787 | 11.4287211761 | 17.5203977147 |
| H  | 18.7544151700 | 10.6728148962 | 18.3158445724 |
| H  | 19.8827081854 | 11.5261323815 | 17.2169963140 |
| H  | 18.4494549494 | 12.3946649550 | 17.8836802657 |

**2 arms up 2 down alternatively (b)**

E = -1324.3667336702



|   |               |               |               |
|---|---------------|---------------|---------------|
| C | 13.2763421765 | 17.6994052483 | 20.0267489184 |
| C | 12.5621873164 | 16.8504262711 | 19.1677492768 |
| C | 12.7770550792 | 15.4661747193 | 18.9902227296 |
| C | 14.2511086866 | 17.0802680328 | 20.8230875132 |
| C | 14.5216491870 | 15.7222923301 | 20.6855804437 |
| C | 13.8250668048 | 14.9250457540 | 19.7685813102 |
| C | 13.0790221440 | 19.2139362924 | 19.9005663041 |
| C | 14.1543728969 | 19.7134039665 | 18.9289767402 |
| C | 13.8194478040 | 19.8117124540 | 17.5709759290 |
| C | 14.7126535769 | 20.0405802998 | 16.5052930983 |
| C | 14.0586431187 | 20.0856478222 | 15.1141428507 |
| C | 14.3798142613 | 18.9337685244 | 14.1445970427 |
| C | 13.2979309539 | 18.0575056297 | 13.9165729360 |
| C | 13.2986353610 | 16.9199122815 | 13.0991333401 |
| C | 15.5666421147 | 18.5980706459 | 13.4536116202 |
| C | 15.6060679020 | 17.4876028247 | 12.5983079678 |
| C | 14.4995497038 | 16.6615500836 | 12.4171997543 |
| C | 15.5069699744 | 19.9248126115 | 19.2434983788 |
| C | 16.4435233594 | 20.1384658057 | 18.2330810991 |
| C | 16.0662224770 | 20.1713972393 | 16.8846238632 |
| C | 11.8348137974 | 14.7886846159 | 17.9801369965 |
| C | 12.4318570996 | 14.3527710717 | 16.6308605561 |
| C | 12.0768906121 | 15.9956220309 | 13.1534235930 |
| C | 12.3983468711 | 14.9120634121 | 14.1860654781 |
| C | 12.0127862837 | 15.1139757034 | 15.5195423764 |
| C | 13.3379499763 | 13.3113328053 | 16.3284508359 |
| C | 13.6932749824 | 13.0282229874 | 15.0032340982 |
| C | 13.2192305811 | 13.8012303101 | 13.9461817906 |
| O | 17.1500829182 | 20.2636930559 | 16.0104535961 |
| O | 16.8093462983 | 19.2252075622 | 13.5513814163 |
| C | 16.8930919753 | 20.6009962210 | 13.6636880292 |
| C | 17.0758237622 | 21.1468063821 | 14.9481129538 |
| C | 17.2171893825 | 22.5248592382 | 15.1477807244 |
| C | 17.1610893222 | 23.3302725576 | 14.0103747890 |
| C | 16.9849297300 | 22.7820714616 | 12.7213399574 |
| C | 16.8529796487 | 21.4080975140 | 12.5209958446 |
| O | 15.9026418043 | 20.0189393841 | 20.5853067703 |
| C | 16.8061581193 | 19.1005248718 | 21.1038266972 |
| C | 16.2826195560 | 17.9540621951 | 21.7526909678 |
| C | 17.1157088395 | 17.0582530461 | 22.4322672829 |
| C | 18.1780692315 | 19.3823595373 | 21.1226628810 |
| C | 18.4827447515 | 17.3359800318 | 22.4314476505 |
| C | 19.0053093432 | 18.4767627452 | 21.7901296534 |
| O | 14.9028678839 | 17.8190648809 | 21.8194004631 |
| O | 14.3577962456 | 13.6392837817 | 19.6866354522 |
| C | 13.5503547284 | 12.5223225448 | 19.5870175989 |
| C | 13.3889830303 | 11.9398378483 | 18.3152818801 |
| O | 14.0404271040 | 12.5358375878 | 17.2513502951 |
| C | 13.0084423976 | 11.9376448372 | 20.7371677343 |
| C | 12.3082215509 | 10.7441667520 | 20.5619329285 |
| C | 12.1481718001 | 10.1581125255 | 19.2875516410 |
| C | 12.6815622705 | 10.7448573565 | 18.1397300038 |
| O | 13.4993047991 | 13.4324415805 | 12.6240225006 |
| O | 14.5565119068 | 15.6383492204 | 11.4611062016 |
| C | 15.3907852974 | 14.5429869679 | 11.6434592135 |
| C | 14.8247033475 | 13.3771253828 | 12.2174346587 |
| C | 16.6860973533 | 14.5304032313 | 11.1089266513 |
| C | 17.3839378587 | 13.3208286699 | 11.1551675335 |
| C | 16.8037713169 | 12.1560591660 | 11.6966318684 |
| C | 15.5192901739 | 12.1629610797 | 12.2408095388 |
| N | 18.6345298667 | 12.9410508685 | 10.6696623774 |

|    |               |               |               |
|----|---------------|---------------|---------------|
| N  | 17.7251525856 | 11.1318634707 | 11.5041397817 |
| C  | 18.8585045737 | 11.5983577295 | 10.8780391692 |
| N  | 16.9494141339 | 23.8600590643 | 11.8406387604 |
| N  | 17.2224199726 | 24.7111989875 | 13.8411866938 |
| C  | 17.0588078578 | 25.0535553395 | 12.5179380381 |
| N  | 20.3769645075 | 18.4647585661 | 22.0319804030 |
| C  | 20.7360705872 | 17.3692318715 | 22.7844045928 |
| N  | 19.5627308830 | 16.6918460318 | 23.0272310073 |
| N  | 11.6998955084 | 9.8796445116  | 21.4677781628 |
| N  | 11.4488040503 | 8.9708999757  | 19.4903812757 |
| C  | 11.1679584620 | 8.7843719799  | 20.8249833019 |
| H  | 12.3736002355 | 18.2681369498 | 14.4588374859 |
| H  | 16.5334194203 | 17.2866734264 | 12.0654918957 |
| H  | 11.3603831723 | 15.9667007126 | 15.7214973934 |
| H  | 14.3692773019 | 12.1953210436 | 14.8201052770 |
| H  | 11.7910443976 | 17.3131038889 | 18.5475137396 |
| H  | 15.2977481649 | 15.2508100898 | 21.2846018631 |
| H  | 12.7700388144 | 19.6564802615 | 17.3109497621 |
| H  | 17.4951203585 | 20.2780926812 | 18.4760899271 |
| H  | 16.6866484216 | 20.9630594199 | 11.5411965866 |
| H  | 17.3278612878 | 22.9246858324 | 16.1546660571 |
| H  | 18.5575127786 | 20.2930074201 | 20.6625430114 |
| H  | 16.6907420434 | 16.2077433422 | 22.9620642850 |
| H  | 17.0943183339 | 15.4225439342 | 10.6375017335 |
| H  | 15.0439264628 | 11.2674328206 | 12.6369677837 |
| H  | 12.5733223383 | 10.3135264582 | 17.1457096090 |
| H  | 13.1459407869 | 12.4095761318 | 21.7088461859 |
| C  | 13.9176818437 | 21.4926184830 | 14.4795724553 |
| H  | 13.0138805070 | 19.8530981762 | 15.3704480419 |
| H  | 13.2383374402 | 21.4312076782 | 13.6160663881 |
| H  | 14.8491597814 | 21.9449895869 | 14.1351629518 |
| H  | 13.4679430510 | 22.1762027698 | 15.2154547286 |
| C  | 12.9113672391 | 20.0069442912 | 21.2100628692 |
| H  | 13.8076693800 | 19.9802649095 | 21.8355595720 |
| H  | 12.0721834402 | 19.5949305344 | 21.7899352021 |
| H  | 12.6824976119 | 21.0578688639 | 20.9785986887 |
| H  | 12.1301359649 | 19.3285582163 | 19.3505144459 |
| C  | 11.5101442923 | 15.5313680732 | 11.7988496305 |
| H  | 12.2309984536 | 14.9491891059 | 11.2185340684 |
| H  | 11.2143959127 | 16.4080544553 | 11.2035273400 |
| H  | 10.6157678144 | 14.9116881404 | 11.9609488926 |
| H  | 11.2862578627 | 16.6046336624 | 13.6224694744 |
| H  | 11.2067236056 | 15.6385246600 | 17.6712181474 |
| C  | 10.7877558506 | 13.8181203029 | 18.5863673406 |
| H  | 10.2709655162 | 14.3181257363 | 19.4193948073 |
| H  | 10.0378959740 | 13.5720345917 | 17.8194958657 |
| H  | 11.1948885384 | 12.8775458176 | 18.9650841548 |
| Rh | 16.9100025800 | 26.8871338287 | 11.7624794604 |
| I  | 14.2523926374 | 26.6039813405 | 12.1816800024 |
| C  | 16.6911016360 | 28.6322455732 | 10.3694560569 |
| H  | 15.6937970477 | 28.4685070006 | 9.9519568739  |
| C  | 16.7537960210 | 29.1010116761 | 11.6814332635 |
| H  | 15.8008808011 | 29.2995525273 | 12.1816082108 |
| C  | 18.7549955471 | 26.7018807183 | 10.7229994304 |
| H  | 19.0401412399 | 25.6452446161 | 10.6700617638 |
| C  | 18.9950019351 | 27.3574991789 | 11.9668629145 |
| H  | 19.4163993568 | 26.7377539064 | 12.7639594808 |
| C  | 19.2687221504 | 28.8534807057 | 12.1043501159 |
| C  | 18.6747110943 | 27.3762618323 | 9.3674114529  |
| C  | 17.9793321037 | 29.6711328789 | 12.3655622800 |
| C  | 17.8446440641 | 28.6842951794 | 9.3798896559  |

|    |               |               |               |
|----|---------------|---------------|---------------|
| H  | 17.4440947083 | 28.8686874635 | 8.3710722837  |
| H  | 18.4893327127 | 29.5444259026 | 9.6108966998  |
| H  | 19.6897268599 | 27.5663805231 | 8.9697521256  |
| H  | 18.2072894564 | 26.6623657208 | 8.6700526425  |
| H  | 19.9746903373 | 29.0187018114 | 12.9328917121 |
| H  | 19.7796072202 | 29.2171547167 | 11.2003688656 |
| H  | 17.7764650863 | 29.6853553654 | 13.4478849875 |
| H  | 18.1251402546 | 30.7271882688 | 12.0705745724 |
| Rh | 22.5468881877 | 16.8656300275 | 23.4314862629 |
| I  | 22.8697450239 | 15.6311513716 | 21.0568517660 |
| C  | 22.5809798573 | 18.4884956540 | 24.8047947695 |
| H  | 21.8221511739 | 19.2251674524 | 24.5175864356 |
| C  | 22.1051921430 | 17.3275092786 | 25.4836504136 |
| H  | 21.0227900415 | 17.2710587125 | 25.6332418130 |
| C  | 24.1348504949 | 15.6458633704 | 24.3871469503 |
| H  | 24.2141298629 | 14.7812932913 | 23.7209053674 |
| C  | 24.7327732200 | 16.8293100651 | 23.9551013429 |
| H  | 25.2055796041 | 16.8100898937 | 22.9693198826 |
| C  | 23.6792002150 | 15.3379694556 | 25.7986491160 |
| C  | 22.9294121359 | 16.5113681292 | 26.4769834271 |
| C  | 25.0918559507 | 17.9963408964 | 24.8612509632 |
| C  | 23.9770449861 | 19.0700380023 | 24.9084840313 |
| H  | 23.0063178255 | 14.4677537682 | 25.7434396975 |
| H  | 24.5381549167 | 15.0174809077 | 26.4175307606 |
| H  | 23.6368538236 | 17.1714288045 | 27.0005433401 |
| H  | 22.2629429359 | 16.1099076808 | 27.2560806216 |
| H  | 26.0244374239 | 18.4574639213 | 24.5008764125 |
| H  | 25.3094860433 | 17.6253233655 | 25.8729614586 |
| H  | 24.1100313253 | 19.7618683266 | 24.0610299462 |
| H  | 24.0724083846 | 19.6875313160 | 25.8218889664 |
| Rh | 10.2690988284 | 7.2350901368  | 21.6838213556 |
| I  | 7.9406791705  | 8.5185717568  | 21.2255895330 |
| C  | 12.0952081010 | 6.4981453664  | 22.5481386806 |
| H  | 12.8030437458 | 7.3281541519  | 22.6334348629 |
| C  | 11.9154745800 | 5.9638101052  | 21.2381223511 |
| H  | 12.5207454642 | 6.4156712785  | 20.4442036919 |
| C  | 9.3890858369  | 6.0055178729  | 23.3083278638 |
| H  | 8.4979957710  | 6.5746576162  | 23.5906542588 |
| C  | 9.3090819143  | 5.2512215065  | 22.1382217863 |
| H  | 8.3732852647  | 5.3133364264  | 21.5761330033 |
| C  | 11.4343575378 | 4.5648604443  | 20.9076929558 |
| C  | 10.2434250011 | 4.1049213884  | 21.7838922527 |
| C  | 10.4410598852 | 5.8689001277  | 24.3900456613 |
| C  | 11.8784803462 | 5.7088306063  | 23.8369277111 |
| H  | 11.1225415987 | 4.5645700974  | 19.8507951965 |
| H  | 12.2688735206 | 3.8415391043  | 20.9780856696 |
| H  | 9.6746907983  | 3.3309917887  | 21.2457578239 |
| H  | 10.6075465862 | 3.6267578704  | 22.7043213540 |
| H  | 12.1115097609 | 4.6480478110  | 23.6631529635 |
| H  | 12.5982302536 | 6.0512730413  | 24.5965417445 |
| H  | 10.3958709781 | 6.7786448585  | 25.0093594956 |
| H  | 10.1900553057 | 5.0300012593  | 25.0658716311 |
| Rh | 20.4473608344 | 10.5289344724 | 10.3362892631 |
| I  | 21.3772155409 | 10.9564711891 | 12.8303041084 |
| C  | 21.8495301223 | 8.8314262900  | 9.9019858710  |
| H  | 22.0464189259 | 8.4341729419  | 10.9015885459 |
| C  | 22.4729165073 | 10.0344714730 | 9.5714456303  |
| H  | 23.1336316420 | 10.4718475936 | 10.3262145506 |
| C  | 19.3324080110 | 9.5682250865  | 8.7983705816  |
| H  | 18.2613412715 | 9.7161205268  | 8.9763334360  |
| C  | 20.0359216374 | 10.6720863099 | 8.2319155123  |

|   |               |               |               |
|---|---------------|---------------|---------------|
| H | 19.4452827141 | 11.5750364099 | 8.0499131290  |
| C | 21.2430622151 | 7.8680379582  | 8.8931320252  |
| C | 19.7282208599 | 8.1094200586  | 8.6793798778  |
| C | 21.2819166392 | 10.5363611485 | 7.3593772502  |
| C | 22.5915886383 | 10.6245228084 | 8.1816024648  |
| H | 21.2385198345 | 9.5890536939  | 6.8014987279  |
| H | 21.2802072360 | 11.3313317614 | 6.5976958791  |
| H | 19.1641768441 | 7.5508019224  | 9.4435811390  |
| H | 19.4052486434 | 7.6990428065  | 7.7037738350  |
| H | 21.7815024033 | 7.9479286494  | 7.9379249963  |
| H | 21.3997211601 | 6.8358292420  | 9.2428216043  |
| H | 22.8718322759 | 11.6832790764 | 8.2965433439  |
| H | 23.4255801309 | 10.1483487688 | 7.6326774171  |
| C | 11.0044187242 | 8.0822315989  | 18.4247152073 |
| H | 11.8681231012 | 7.6550096709  | 17.8945043814 |
| H | 10.4117720628 | 7.2807057490  | 18.8887348788 |
| H | 10.3691050766 | 8.6348961394  | 17.7175557183 |
| C | 17.5514641718 | 9.7665572807  | 11.9809859832 |
| H | 18.4640108354 | 9.2090159322  | 11.7236834197 |
| H | 17.4282415383 | 9.7640764477  | 13.0737966436 |
| H | 16.6766706103 | 9.3018073343  | 11.5031030048 |
| C | 16.6503557799 | 23.7475101935 | 10.4192666889 |
| H | 15.6294465606 | 23.3624906622 | 10.2788363586 |
| H | 16.7093572600 | 24.7562472473 | 9.9863943119  |
| H | 17.3748424509 | 23.0804212438 | 9.9304666399  |
| C | 19.6159730616 | 13.8536495084 | 10.0991637291 |
| H | 19.9268767928 | 14.5931814772 | 10.8516090686 |
| H | 20.4881825338 | 13.2519783930 | 9.8031845294  |
| H | 19.1972143847 | 14.3664840969 | 9.2212650609  |
| C | 17.2716136710 | 25.6714421876 | 14.9355539070 |
| H | 18.1138213793 | 25.4397800206 | 15.6029298135 |
| H | 17.4006245466 | 26.6702837684 | 14.4939959272 |
| H | 16.3271646492 | 25.6510748425 | 15.4997590863 |
| C | 21.3239765716 | 19.4217802972 | 21.4752005658 |
| H | 21.1038659478 | 20.4363532177 | 21.8380811995 |
| H | 22.3298986135 | 19.1149660077 | 21.7967832962 |
| H | 21.2789739318 | 19.3977797543 | 20.3765214977 |
| C | 19.4784397578 | 15.4238725204 | 23.7384767278 |
| H | 20.4859317527 | 15.1930340681 | 24.1155235745 |
| H | 18.7711185229 | 15.5037767249 | 24.5768320491 |
| H | 19.1583334036 | 14.6260928259 | 23.0522243056 |
| C | 11.5745953033 | 10.1365003937 | 22.8957977221 |
| H | 10.9323272367 | 11.0125014956 | 23.0689723512 |
| H | 11.1058599339 | 9.2500209059  | 23.3483746325 |
| H | 12.5666843012 | 10.3067275767 | 23.3385198766 |

**1 arm up 3 arms down**

|     |                  |               |               |
|-----|------------------|---------------|---------------|
| E = | -1324.3605999621 |               |               |
| C   | 15.4542661142    | 17.2807313411 | 18.2499831604 |
| C   | 14.5704646231    | 16.4899832108 | 17.4875122248 |
| C   | 14.6278242977    | 15.1060004921 | 17.2435016994 |
| C   | 16.4821196526    | 16.5534026645 | 18.8886346645 |
| C   | 16.5893204745    | 15.1729246067 | 18.6879125827 |
| C   | 15.7159391082    | 14.4563250238 | 17.8680166359 |
| C   | 15.2290701816    | 18.7961504093 | 18.1011413426 |
| C   | 16.2496554074    | 19.4033614803 | 17.1244428823 |
| C   | 15.7474427926    | 19.7110618604 | 15.8463582614 |
| C   | 16.4746286780    | 20.0755722830 | 14.6958859168 |
| C   | 15.6270140419    | 20.1990586404 | 13.4172207553 |
| C   | 15.8096751670    | 19.0703586043 | 12.3852128153 |

|   |               |               |               |
|---|---------------|---------------|---------------|
| C | 14.7171699952 | 18.1845579708 | 12.2686090549 |
| C | 14.6379571831 | 17.0625968487 | 11.4289622765 |
| C | 16.9118098516 | 18.7617719472 | 11.5577671599 |
| C | 16.8618083624 | 17.6784143331 | 10.6702535364 |
| C | 15.7493938295 | 16.8420388986 | 10.5981529163 |
| C | 17.6485452206 | 19.5332915554 | 17.2502405794 |
| C | 18.4205500709 | 19.9406273529 | 16.1607238412 |
| C | 17.8677495660 | 20.1879852188 | 14.9009030747 |
| C | 13.5284702208 | 14.5735890735 | 16.3085923478 |
| C | 13.9726566712 | 14.2025660131 | 14.8837925768 |
| C | 13.4302140813 | 16.1290628807 | 11.5732492930 |
| C | 13.8210723516 | 14.9713069778 | 12.4979953962 |
| C | 13.5341688995 | 15.0781510455 | 13.8679443115 |
| C | 14.7782559108 | 13.1320867814 | 14.4386293618 |
| C | 15.0380322673 | 12.9492928858 | 13.0749379350 |
| C | 14.5658838303 | 13.8445555260 | 12.1172767658 |
| O | 18.8478112234 | 20.4462246403 | 13.9443939190 |
| O | 18.1569408602 | 19.3918474848 | 11.5595370809 |
| C | 18.2524109011 | 20.7684987166 | 11.6511675530 |
| C | 18.6107501822 | 21.3163141917 | 12.8978968188 |
| C | 18.8122311878 | 22.6907329490 | 13.0664226430 |
| C | 18.6318715176 | 23.4927983968 | 11.9399305578 |
| C | 18.2710881069 | 22.9451028710 | 10.6895852664 |
| C | 18.0790131130 | 21.5734796904 | 10.5188705002 |
| O | 18.4246822326 | 19.1989715297 | 18.3574616895 |
| C | 17.9502296283 | 19.3808495648 | 19.6429025628 |
| C | 17.4659570921 | 18.2533969145 | 20.3367385773 |
| C | 17.0686537111 | 18.3333279730 | 21.6765116196 |
| C | 18.0527581201 | 20.6326538349 | 20.2610060391 |
| C | 17.1586588666 | 19.5841929616 | 22.2868409018 |
| C | 17.6431022114 | 20.7132654389 | 21.5921016017 |
| O | 17.4983149742 | 17.0184989574 | 19.7203477156 |
| O | 16.1176024116 | 13.1317393284 | 17.7048209821 |
| C | 15.1959493528 | 12.1068198811 | 17.6125692728 |
| C | 14.8573251225 | 11.6291111447 | 16.3314292041 |
| O | 15.4670937315 | 12.2229214785 | 15.2416265006 |
| C | 14.7033476388 | 11.5030092473 | 18.7748880762 |
| C | 13.8623311443 | 10.4045003913 | 18.6026011247 |
| C | 13.5204236409 | 9.9263790804  | 17.3190089386 |
| C | 14.0098852452 | 10.5279977344 | 16.1594733900 |
| O | 14.7679429047 | 13.5705234624 | 10.7567868132 |
| O | 15.7018737265 | 15.8445748427 | 9.6123565422  |
| C | 16.5633484341 | 14.7572266404 | 9.6851407390  |
| C | 16.0688079974 | 13.5649848362 | 10.2715511322 |
| C | 17.8196126469 | 14.7920534637 | 9.0652803001  |
| C | 18.5659953780 | 13.6116120313 | 9.0683738269  |
| C | 18.0711611655 | 12.4285435277 | 9.6517193007  |
| C | 16.8128888631 | 12.3798201130 | 10.2512475151 |
| N | 19.8131646743 | 13.2897399676 | 8.5365757976  |
| N | 19.0438918913 | 11.4539116991 | 9.4497244783  |
| C | 20.1298038461 | 11.9725864200 | 8.7816799472  |
| N | 18.1776113671 | 24.0191097630 | 9.8073223382  |
| N | 18.7409455859 | 24.8673214499 | 11.7473910814 |
| C | 18.4409547508 | 25.2087471833 | 10.4479887900 |
| N | 17.6019870791 | 21.7727233825 | 22.4945170924 |
| C | 17.1254673363 | 21.3603866752 | 23.7189314060 |
| N | 16.8436186789 | 20.0214932488 | 23.5702008461 |
| N | 13.2392084809 | 9.5563958666  | 19.5137970014 |
| N | 12.7028770108 | 8.8174884063  | 17.5224459244 |
| C | 12.5165166923 | 8.5807805185  | 18.8656735966 |
| H | 13.8592502225 | 18.3725470751 | 12.9181733396 |

|    |               |               |               |
|----|---------------|---------------|---------------|
| H  | 17.7238928394 | 17.5040046641 | 10.0299088975 |
| H  | 12.9450294527 | 15.9425716412 | 14.1825179520 |
| H  | 15.6342296596 | 12.0886031731 | 12.7797811634 |
| H  | 13.7642839397 | 17.0290642292 | 16.9850023884 |
| H  | 17.4027133530 | 14.6378645645 | 19.1751303073 |
| H  | 14.6694561711 | 19.5933613520 | 15.7151765087 |
| H  | 19.4981147346 | 20.0301955675 | 16.2858530522 |
| H  | 17.7913096965 | 21.1271249510 | 9.5681594519  |
| H  | 19.0820493830 | 23.0884064579 | 14.0434107767 |
| H  | 18.4386778741 | 21.4856096831 | 19.7048255456 |
| H  | 16.7061154343 | 17.4445457780 | 22.1904571266 |
| H  | 18.1697460004 | 15.7020637107 | 8.5814738686  |
| H  | 16.3982742422 | 11.4639286375 | 10.6675806812 |
| H  | 13.7597005637 | 10.1796165502 | 15.1585156526 |
| H  | 14.9805363481 | 11.8927592936 | 19.7531355070 |
| C  | 15.4193644671 | 21.6254467764 | 12.8494118826 |
| H  | 14.6237929444 | 19.9658861526 | 13.8062320356 |
| H  | 14.6369597726 | 21.5953260943 | 12.0760022863 |
| H  | 16.3034305580 | 22.0876610899 | 12.4067794199 |
| H  | 15.0692395503 | 22.2850346683 | 13.6578188893 |
| C  | 14.7978117779 | 19.6246839816 | 19.3336040171 |
| H  | 15.5691221456 | 19.7989097371 | 20.0848407899 |
| H  | 13.9562119897 | 19.1160780232 | 19.8280504711 |
| H  | 14.4405248033 | 20.6077012225 | 18.9902154274 |
| H  | 14.3100682273 | 18.8166170865 | 17.4951730922 |
| C  | 12.7157467984 | 15.7443745307 | 10.2627121069 |
| H  | 13.3565372765 | 15.1686490414 | 9.5890767315  |
| H  | 12.3904116003 | 16.6547987748 | 9.7376588040  |
| H  | 11.8226426830 | 15.1430821687 | 10.4887892986 |
| H  | 12.6988989861 | 16.7130075262 | 12.1564519120 |
| H  | 12.9490596015 | 15.4902470149 | 16.1183666374 |
| C  | 12.4604581107 | 13.6515957097 | 16.9504756633 |
| H  | 12.0678694608 | 14.1343543469 | 17.8581218718 |
| H  | 11.6244884758 | 13.5245984693 | 16.2460279158 |
| H  | 12.8101975634 | 12.6557746047 | 17.2307486615 |
| Rh | 18.3576662375 | 27.0476227620 | 9.6949914210  |
| I  | 15.7387792020 | 26.9764971553 | 10.3634374463 |
| C  | 18.1605298398 | 28.8318580332 | 8.3443929281  |
| H  | 17.1201081876 | 28.7573722136 | 8.0158619045  |
| C  | 18.3760102490 | 29.2651838361 | 9.6523528444  |
| H  | 17.4896235369 | 29.5287096517 | 10.2375974908 |
| C  | 20.0779146445 | 26.7322709010 | 8.4846892275  |
| H  | 20.2678418079 | 25.6567473372 | 8.3943546368  |
| C  | 20.4855478150 | 27.3420471543 | 9.7082124875  |
| H  | 20.9280472961 | 26.6728291489 | 10.4520980953 |
| C  | 20.8903037280 | 28.8079917373 | 9.8467887215  |
| C  | 19.9264967921 | 27.4334702951 | 7.1490682728  |
| C  | 19.6980905763 | 29.7160224773 | 10.2384228497 |
| C  | 19.2221369300 | 28.8085130619 | 7.2560811935  |
| H  | 18.7519009272 | 29.0512760426 | 6.2905804354  |
| H  | 19.9591320189 | 29.6029273066 | 7.4414916975  |
| H  | 20.9104612863 | 27.5399616618 | 6.6540257608  |
| H  | 19.3302135753 | 26.7755210448 | 6.4962987877  |
| H  | 21.6762237651 | 28.8955214705 | 10.6129310998 |
| H  | 21.3484007494 | 29.1542611295 | 8.9084778328  |
| H  | 19.5897582890 | 29.7115831718 | 11.3344874412 |
| H  | 19.9028275597 | 30.7665015237 | 9.9589240716  |
| Rh | 16.8998249686 | 22.4485004079 | 25.3671181038 |
| I  | 19.4452279040 | 21.7553602100 | 25.9405354700 |
| C  | 15.3373449306 | 23.5957157770 | 24.4916064625 |
| H  | 15.3563500156 | 23.4692692783 | 23.4031832825 |

|    |               |               |               |
|----|---------------|---------------|---------------|
| C  | 14.7550892007 | 22.5288338754 | 25.2382136777 |
| H  | 14.4061669433 | 21.6707377526 | 24.6559842929 |
| C  | 16.4638639492 | 22.9393812319 | 27.4883903622 |
| H  | 17.2506757428 | 22.4062687363 | 28.0309298448 |
| C  | 16.8294168174 | 24.1275599057 | 26.8566997662 |
| H  | 17.8819823546 | 24.4163338993 | 26.9234761731 |
| C  | 15.0498052805 | 22.4800586804 | 27.7773973843 |
| C  | 14.0742823185 | 22.6998068423 | 26.5944337226 |
| C  | 15.8531521823 | 25.2053713922 | 26.4131542564 |
| C  | 15.4285661161 | 25.0434655549 | 24.9328040122 |
| H  | 15.0944701689 | 21.4040330224 | 28.0083384286 |
| H  | 14.6664293300 | 22.9705868898 | 28.6917126159 |
| H  | 13.6132767590 | 23.6969735686 | 26.6530175600 |
| H  | 13.2433788413 | 21.9820109896 | 26.6752500242 |
| H  | 16.3208495360 | 26.1924998524 | 26.5512125017 |
| H  | 14.9702575403 | 25.1951592275 | 27.0679457540 |
| H  | 16.1744835590 | 25.5385839379 | 24.2901244070 |
| H  | 14.4719431513 | 25.5667793164 | 24.7447147660 |
| Rh | 11.4572755700 | 7.1287246791  | 19.7116150384 |
| I  | 9.3592422735  | 8.8242882803  | 19.5790802300 |
| C  | 13.1878979243 | 6.0262546523  | 20.3515268685 |
| H  | 14.0325191920 | 6.7170797712  | 20.4336800752 |
| C  | 12.8193472563 | 5.6442298535  | 19.0276029017 |
| H  | 13.4328618966 | 6.0552946793  | 18.2178663750 |
| C  | 10.5031821704 | 5.9255518977  | 21.3147556161 |
| H  | 9.7501584700  | 6.6091731304  | 21.7185920208 |
| C  | 10.2044956390 | 5.3048466792  | 20.1022235447 |
| H  | 9.2545547762  | 5.5739838380  | 19.6322657241 |
| C  | 12.0788220670 | 4.3791897374  | 18.6412398447 |
| C  | 10.8931671000 | 4.0526456597  | 19.5823655852 |
| C  | 11.5935946520 | 5.5154574240  | 22.2833561715 |
| C  | 12.9370441047 | 5.1732337528  | 21.5928967608 |
| H  | 11.6947310776 | 4.5207165376  | 17.6181290171 |
| H  | 12.7777162597 | 3.5228362418  | 18.5867442531 |
| H  | 10.1584404743 | 3.4371291779  | 19.0404893279 |
| H  | 11.2337968647 | 3.4403756966  | 20.4295952703 |
| H  | 12.9728085343 | 4.1077952634  | 21.3210995147 |
| H  | 13.7593155488 | 5.3260412714  | 22.3089869175 |
| H  | 11.7516460385 | 6.3565676999  | 22.9766588043 |
| H  | 11.2526811220 | 4.6684962327  | 22.9078158127 |
| Rh | 21.8186170746 | 11.0300663882 | 8.3055151247  |
| I  | 22.7081065397 | 11.8333032710 | 10.7246320641 |
| C  | 23.4251441236 | 9.4903375710  | 8.0274908229  |
| H  | 23.6787776328 | 9.2346833371  | 9.0599733784  |
| C  | 23.8831722045 | 10.7207403527 | 7.5559611281  |
| H  | 24.4875840759 | 11.3186976562 | 8.2448745246  |
| C  | 20.8239922267 | 9.7745375377  | 6.9062707871  |
| H  | 19.7440860708 | 9.8042240728  | 7.0899677312  |
| C  | 21.3739778503 | 10.8895962913 | 6.2074001551  |
| H  | 20.6707876290 | 11.6850559539 | 5.9433646269  |
| C  | 22.9398926329 | 8.3513349203  | 7.1446004873  |
| C  | 21.4043954678 | 8.3741224564  | 6.9426987886  |
| C  | 22.6214205061 | 10.8193186778 | 5.3291376582  |
| C  | 23.9133350249 | 11.1673910591 | 6.1090053678  |
| H  | 22.6996908014 | 9.8180237802  | 4.8804222663  |
| H  | 22.5106718119 | 11.5171555588 | 4.4847968336  |
| H  | 20.9261567767 | 7.8415935049  | 7.7807881856  |
| H  | 21.1251272974 | 7.8143718573  | 6.0299167206  |
| H  | 23.4551776479 | 8.3903044049  | 6.1742097698  |
| H  | 23.2305633654 | 7.3935636780  | 7.6030874605  |
| H  | 24.0509701182 | 12.2601089209 | 6.1049064272  |

|   |               |               |               |
|---|---------------|---------------|---------------|
| H | 24.7997727648 | 10.7482475611 | 5.5969399923  |
| C | 12.0441652966 | 8.0701927828  | 16.4598807738 |
| H | 12.7890742643 | 7.6151933946  | 15.7909744359 |
| H | 11.4354601663 | 7.2881361042  | 16.9365335301 |
| H | 11.3834672171 | 8.7366451389  | 15.8865257903 |
| C | 18.9828418586 | 10.1048577092 | 9.9950435753  |
| H | 19.9099000403 | 9.5893392046  | 9.7050819176  |
| H | 18.9282942212 | 10.1470720911 | 11.0929634403 |
| H | 18.1097405277 | 9.5685794656  | 9.5958618366  |
| C | 17.7165178707 | 23.9155465999 | 8.4293197810  |
| H | 16.6894226994 | 23.5224765582 | 8.4058965189  |
| H | 17.7182002879 | 24.9291723359 | 8.0031253371  |
| H | 18.3829206616 | 23.2595569484 | 7.8509657810  |
| C | 20.7195816839 | 14.2454057750 | 7.9146963633  |
| H | 21.0722334103 | 14.9740090078 | 8.6596316273  |
| H | 21.5817818359 | 13.6795415103 | 7.5320588584  |
| H | 20.2127922571 | 14.7657626743 | 7.0892353725  |
| C | 18.9953699413 | 25.8307250780 | 12.8099876265 |
| H | 19.9281806505 | 25.5789225934 | 13.3346428619 |
| H | 19.0791153864 | 26.8221075189 | 12.3407860629 |
| H | 18.1555281648 | 25.8415288697 | 13.5204461366 |
| C | 18.1199122740 | 23.1070544025 | 22.2227182249 |
| H | 17.5608108177 | 23.5764157324 | 21.4001369342 |
| H | 18.0079700602 | 23.6977206737 | 23.1436025468 |
| H | 19.1874311983 | 23.0478808780 | 21.9646369080 |
| C | 16.3822225288 | 19.1577459526 | 24.6485512639 |
| H | 16.1698607079 | 19.8011372594 | 25.5153764882 |
| H | 15.4717631905 | 18.6227335603 | 24.3422731600 |
| H | 17.1684114187 | 18.4381422223 | 24.9206949184 |
| C | 13.2569538753 | 9.7390730373  | 20.9587847440 |
| H | 12.7087831249 | 10.6528846942 | 21.2317555811 |
| H | 12.7502819471 | 8.8708432795  | 21.4055072900 |
| H | 14.2933920438 | 9.8000476653  | 21.3202345817 |

**Kite**

|     |                  |               |               |
|-----|------------------|---------------|---------------|
| E = | -1324.3644574462 |               |               |
| C   | 17.3542546698    | 16.7735780659 | 20.5183347468 |
| C   | 16.5289220387    | 15.9461746663 | 19.7308826673 |
| C   | 16.6713149093    | 14.5783799621 | 19.4568426805 |
| C   | 18.4230618726    | 16.0993163211 | 21.1515051442 |
| C   | 18.6426988427    | 14.7395437880 | 20.8763490490 |
| C   | 17.8174519505    | 13.9914763830 | 20.0339904490 |
| C   | 16.9673904359    | 18.2591660828 | 20.4316413040 |
| C   | 17.8043533349    | 19.0152648787 | 19.3961009563 |
| C   | 17.1677465232    | 19.4806574232 | 18.2371189967 |
| C   | 17.7655917623    | 20.1902343477 | 17.1723010333 |
| C   | 16.9033526703    | 20.2497244676 | 15.8978115424 |
| C   | 17.2599557555    | 19.0461918152 | 15.0075379332 |
| C   | 16.2533478736    | 18.1057858352 | 14.7131759133 |
| C   | 16.4658740127    | 16.8617979041 | 14.0910869485 |
| C   | 18.5628964789    | 18.6912622528 | 14.6032380685 |
| C   | 18.8264926218    | 17.4784152560 | 13.9679258345 |
| C   | 17.7945588177    | 16.5763074231 | 13.7215511605 |
| C   | 19.1951564048    | 19.2208572530 | 19.4259170590 |
| C   | 19.8196299819    | 20.0235166472 | 18.4756502014 |
| C   | 19.1131893384    | 20.5612148345 | 17.3899498785 |
| C   | 15.5811329397    | 13.9909014354 | 18.5504742926 |
| C   | 16.0101226890    | 13.6670598165 | 17.1125033813 |
| C   | 15.3193242500    | 15.8423759833 | 14.0447934016 |
| C   | 15.7683295043    | 14.5549427969 | 14.7576421882 |
| C   | 15.5508387575    | 14.5787458822 | 16.1471210856 |



|   |               |               |               |
|---|---------------|---------------|---------------|
| C | 16.8155078193 | 12.6299123064 | 16.5951003036 |
| C | 17.0041757659 | 12.5084375752 | 15.2150891629 |
| C | 16.4843364524 | 13.4282867297 | 14.2968612677 |
| O | 19.8680249746 | 21.5322016837 | 16.7198738313 |
| O | 19.6879098830 | 19.4625334963 | 14.8986484522 |
| C | 19.6856147800 | 20.7625882440 | 14.4184231022 |
| C | 19.7867919731 | 21.7953332104 | 15.3709972219 |
| C | 19.8469622195 | 23.1396596496 | 14.9800076623 |
| C | 19.7552077685 | 23.4056523578 | 13.6150577991 |
| C | 19.6179571757 | 22.3721217172 | 12.6647148156 |
| C | 19.5918978748 | 21.0322947970 | 13.0481457726 |
| O | 20.0238113236 | 18.5596525830 | 20.3357006406 |
| C | 19.8476920794 | 18.8856346489 | 21.6701126193 |
| C | 19.4662183341 | 17.8536381831 | 22.5520034823 |
| C | 19.3146734017 | 18.0959241334 | 23.9248228336 |
| C | 20.0533652931 | 20.1955358439 | 22.1181339966 |
| C | 19.5178642324 | 19.4021766556 | 24.3686810445 |
| C | 19.8745876005 | 20.4359310449 | 23.4782748844 |
| O | 19.3213689735 | 16.5498103476 | 22.1226152561 |
| O | 18.2973297875 | 12.7056550939 | 19.7774995807 |
| C | 17.4153054352 | 11.6388767898 | 19.7311637180 |
| C | 17.0402521464 | 11.1285764317 | 18.4709557541 |
| O | 17.5662455958 | 11.7131673409 | 17.3314168808 |
| C | 16.9587565844 | 11.0552950516 | 20.9199090368 |
| C | 16.1070469871 | 9.9573618471  | 20.7995493068 |
| C | 15.7372446178 | 9.4439726876  | 19.5380360903 |
| C | 16.2022321338 | 10.0128631119 | 18.3531216632 |
| O | 16.6663103097 | 12.9951160105 | 12.9768986918 |
| O | 18.1723046608 | 15.3481471918 | 13.1769284628 |
| C | 17.5779026262 | 15.0279497026 | 11.9644602926 |
| C | 16.8408784563 | 13.8281291910 | 11.8944601231 |
| C | 17.7034925836 | 15.8779052430 | 10.8586050359 |
| C | 17.0860285797 | 15.4788650421 | 9.6755673402  |
| C | 16.3955895110 | 14.2522019106 | 9.5873838025  |
| C | 16.2641259478 | 13.4066983443 | 10.6869974885 |
| N | 16.9600626945 | 16.0896747479 | 8.4295500347  |
| N | 15.8963655471 | 14.1796884557 | 8.2888535799  |
| C | 16.2340459505 | 15.3015149261 | 7.5661836519  |
| N | 19.5015803241 | 22.9951302222 | 11.4235969257 |
| N | 19.7147897229 | 24.6001675128 | 12.9004119407 |
| C | 19.5209270877 | 24.3645113360 | 11.5575089856 |
| N | 19.9792889928 | 21.5944398083 | 24.2430966659 |
| C | 19.7208460062 | 21.3338116017 | 25.5691998701 |
| N | 19.4212997056 | 19.9912263468 | 25.6281344741 |
| N | 15.4478065569 | 9.1760210686  | 21.7460646718 |
| N | 14.8737344790 | 8.3802046428  | 19.7868039566 |
| C | 14.6612139233 | 8.2241620274  | 21.1377881819 |
| H | 15.2405318716 | 18.3294704715 | 15.0577695387 |
| H | 19.8474259110 | 17.2255469156 | 13.6865894454 |
| H | 14.9811532887 | 15.4303995011 | 16.5252398934 |
| H | 17.5939303062 | 11.6739465439 | 14.8401299976 |
| H | 15.6819658342 | 16.4411731443 | 19.2514348265 |
| H | 19.4954929733 | 14.2477540967 | 21.3409207944 |
| H | 16.1106148421 | 19.2298423328 | 18.1234853924 |
| H | 20.8852550293 | 20.2275982140 | 18.5624998984 |
| H | 19.4775350393 | 20.2140330440 | 12.3386010832 |
| H | 19.9038480066 | 23.9214915801 | 15.7351897934 |
| H | 20.3267365631 | 20.9761431240 | 21.4093449277 |
| H | 19.0258958277 | 17.2816639845 | 24.5870553563 |
| H | 18.2479919925 | 16.8162340746 | 10.9556125675 |
| H | 15.6959594420 | 12.4786509956 | 10.6570095880 |

|    |               |               |               |
|----|---------------|---------------|---------------|
| H  | 15.9168299279 | 9.6490333474  | 17.3671718592 |
| H  | 17.2479457628 | 11.4804603920 | 21.8799410648 |
| C  | 16.6604241141 | 21.5935322131 | 15.1738743741 |
| H  | 15.9039831612 | 19.9856468420 | 16.2793711699 |
| H  | 15.7839596117 | 21.4887540550 | 14.5161414673 |
| H  | 17.4888853792 | 21.9399391906 | 14.5513551474 |
| H  | 16.4352404064 | 22.3793052959 | 15.9103314183 |
| C  | 16.6508655242 | 19.0346580001 | 21.7336288934 |
| H  | 17.5225386161 | 19.3358688785 | 22.3189093923 |
| H  | 16.0056475311 | 18.4185099482 | 22.3779520538 |
| H  | 16.0959696832 | 19.9492392844 | 21.4743212481 |
| H  | 15.9806829286 | 18.2060189334 | 19.9457096614 |
| C  | 14.5305039991 | 15.7622954657 | 12.7176520293 |
| H  | 15.1455176578 | 15.5824215029 | 11.8321506711 |
| H  | 14.0041293931 | 16.7162967480 | 12.5617827974 |
| H  | 13.7744593930 | 14.9652262326 | 12.7782380791 |
| H  | 14.5834521443 | 16.2580174119 | 14.7521030131 |
| H  | 14.9474146583 | 14.8756046597 | 18.3845149152 |
| C  | 14.5765899922 | 13.0160929622 | 19.2134322636 |
| H  | 14.1765598317 | 13.4814526639 | 20.1269984764 |
| H  | 13.7347166951 | 12.8451431557 | 18.5255410306 |
| H  | 14.9786181377 | 12.0405734014 | 19.4907484626 |
| Rh | 19.2138321220 | 25.7363188651 | 10.1511010883 |
| I  | 16.5870506983 | 25.3842890669 | 10.7020265878 |
| C  | 18.8505385611 | 26.8213817451 | 8.2177249116  |
| H  | 17.8771278389 | 26.4289958265 | 7.9102289561  |
| C  | 18.8545243066 | 27.7385605586 | 9.2683402606  |
| H  | 17.8811254613 | 28.0194323108 | 9.6819700039  |
| C  | 21.0777607550 | 25.3460048360 | 9.2058806443  |
| H  | 21.4576766679 | 24.3726127361 | 9.5361441864  |
| C  | 21.2455384481 | 26.4291111100 | 10.1190304343 |
| H  | 21.7171908932 | 26.1814463531 | 11.0746827053 |
| C  | 21.3770520008 | 27.8916216345 | 9.6998259915  |
| C  | 20.9494221384 | 25.4658886415 | 7.6997772152  |
| C  | 20.0132355641 | 28.6257199007 | 9.6757678387  |
| C  | 20.0067941171 | 26.6115342233 | 7.2532555977  |
| H  | 19.6039830376 | 26.3813424740 | 6.2546028276  |
| H  | 20.5694737993 | 27.5498814163 | 7.1435333323  |
| H  | 21.9469142270 | 25.5823780927 | 7.2350805228  |
| H  | 20.5526722953 | 24.5087616253 | 7.3242092035  |
| H  | 22.0519586463 | 28.4090153288 | 10.3992491736 |
| H  | 21.8652310495 | 27.9500382098 | 8.7156478235  |
| H  | 19.7950344119 | 29.0076777393 | 10.6854149573 |
| H  | 20.0639183570 | 29.5152109649 | 9.0199500571  |
| Rh | 19.7974390773 | 22.6215106700 | 27.0852550061 |
| I  | 22.4168994520 | 21.9790418953 | 27.2369475509 |
| C  | 18.0721016032 | 23.6566016155 | 26.3947824011 |
| H  | 17.8793986366 | 23.3877689604 | 25.3500780940 |
| C  | 17.6704398713 | 22.7016821824 | 27.3750342137 |
| H  | 17.2304134163 | 21.7761744970 | 26.9915491983 |
| C  | 19.7813174410 | 23.3918300668 | 29.1669662680 |
| H  | 20.6690915082 | 22.9276819242 | 29.6074832807 |
| C  | 19.9942796671 | 24.4823002659 | 28.3240971906 |
| H  | 21.0341982162 | 24.7684146047 | 28.1435796999 |
| C  | 18.4608028962 | 22.9886649234 | 29.7894083332 |
| C  | 17.2676455589 | 23.0586738799 | 28.8043348614 |
| C  | 18.9322688125 | 25.5034195200 | 27.9459135191 |
| C  | 18.2165790035 | 25.1493328581 | 26.6186282917 |
| H  | 18.5696901204 | 21.9530900959 | 30.1479202538 |
| H  | 18.2575380079 | 23.6002972040 | 30.6883225242 |
| H  | 16.8119682772 | 24.0598533474 | 28.8200756950 |

|    |               |               |               |
|----|---------------|---------------|---------------|
| H  | 16.4804057485 | 22.3668577043 | 29.1422694419 |
| H  | 19.4048116355 | 26.4932465790 | 27.8497667519 |
| H  | 18.2012426480 | 25.5953831212 | 28.7619571856 |
| H  | 18.8008605858 | 25.5549147488 | 25.7768598013 |
| H  | 17.2285995541 | 25.6454190153 | 26.5689421520 |
| Rh | 13.4120942478 | 6.9556039708  | 22.0287190724 |
| I  | 11.5558222794 | 8.8962679736  | 21.6995534964 |
| C  | 14.9512556252 | 5.6848599850  | 22.8179313591 |
| H  | 15.8723029674 | 6.2680639146  | 22.9112768402 |
| C  | 14.6018564599 | 5.2749187421  | 21.4970215873 |
| H  | 15.3007323529 | 5.5577645580  | 20.7019006396 |
| C  | 12.2328833723 | 5.9799511446  | 23.6356169292 |
| H  | 11.5554192386 | 6.7750015260  | 23.9615609280 |
| C  | 11.9164893034 | 5.3347725251  | 22.4401582468 |
| H  | 11.0340639811 | 5.6962005206  | 21.9047998568 |
| C  | 13.7248004146 | 4.0913953947  | 21.1379192003 |
| C  | 12.4575015330 | 3.9765278982  | 22.0216134371 |
| C  | 13.2115326263 | 5.4897854175  | 24.6826715544 |
| C  | 14.5314251096 | 4.9424603911  | 24.0845775540 |
| H  | 13.4184219413 | 4.2143508027  | 20.0865924994 |
| H  | 14.3089649209 | 3.1522790693  | 21.1745950372 |
| H  | 11.6759661257 | 3.4359591425  | 21.4657418285 |
| H  | 12.6669458350 | 3.3705467292  | 22.9148331597 |
| H  | 14.4403195511 | 3.8679688190  | 23.8670246925 |
| H  | 15.3312055992 | 5.0285618845  | 24.8363732305 |
| H  | 13.4423477398 | 6.3415828865  | 25.3416703469 |
| H  | 12.7338470246 | 4.7283272183  | 25.3273700661 |
| Rh | 15.7351398751 | 15.7302687783 | 5.6894973692  |
| I  | 18.0028116149 | 14.4559536896 | 4.9695820802  |
| C  | 14.8386697351 | 15.7091973038 | 3.6287929219  |
| H  | 15.3016111512 | 14.8228205943 | 3.1860900583  |
| C  | 15.6474741357 | 16.8367273800 | 3.7660437909  |
| H  | 16.6720574588 | 16.7573385467 | 3.3896254272  |
| C  | 13.6852081144 | 15.9424615493 | 6.2205047760  |
| H  | 13.5070533309 | 15.4669253307 | 7.1916477487  |
| C  | 14.3017978554 | 17.2283195500 | 6.2527310137  |
| H  | 14.5648984706 | 17.6099083627 | 7.2440269022  |
| C  | 13.3196930723 | 15.7229010124 | 3.6959128311  |
| C  | 12.7879587325 | 15.4157836613 | 5.1177546015  |
| C  | 14.0996693485 | 18.3029867346 | 5.1870872581  |
| C  | 15.1754754633 | 18.2427344302 | 4.0745241726  |
| H  | 13.0926137326 | 18.2072002548 | 4.7551228924  |
| H  | 14.1272483661 | 19.2953874203 | 5.6631283650  |
| H  | 12.7149698181 | 14.3235788584 | 5.2442121345  |
| H  | 11.7587684216 | 15.8041548372 | 5.2380849515  |
| H  | 12.9437262295 | 16.6955707096 | 3.3480403138  |
| H  | 12.9223548807 | 14.9755481387 | 2.9915705809  |
| H  | 16.0554907407 | 18.8224528189 | 4.3951337615  |
| H  | 14.8087539162 | 18.7350392408 | 3.1541962614  |
| C  | 14.1601722192 | 7.6427596139  | 18.7525777167 |
| H  | 14.8709363100 | 7.1381819162  | 18.0823206846 |
| H  | 13.5210090913 | 6.9031072257  | 19.2556907773 |
| H  | 13.5223272531 | 8.3286791405  | 18.1759484662 |
| C  | 15.1794485983 | 13.0362246872 | 7.7412659788  |
| H  | 14.9499499347 | 13.2635023238 | 6.6897504554  |
| H  | 15.8154595791 | 12.1400929487 | 7.7828673657  |
| H  | 14.2496559521 | 12.8606726260 | 8.3019137817  |
| C  | 19.2212105259 | 22.2981717035 | 10.1761865370 |
| H  | 18.2599119719 | 21.7682007090 | 10.2501276482 |
| H  | 19.1458105778 | 23.0560753015 | 9.3831840695  |
| H  | 20.0273628960 | 21.5865250651 | 9.9458650568  |

|   |               |               |               |
|---|---------------|---------------|---------------|
| C | 17.5896469612 | 17.3484702004 | 8.0569103651  |
| H | 18.6844293855 | 17.2394842150 | 8.0554335499  |
| H | 17.2526125553 | 17.5949280444 | 7.0389106175  |
| H | 17.2914992578 | 18.1439662039 | 8.7556690361  |
| C | 19.6958361830 | 25.9226039047 | 13.5108788802 |
| H | 20.5656052429 | 26.0453854349 | 14.1720082150 |
| H | 19.7290096678 | 26.6622996769 | 12.6973650499 |
| H | 18.7658010966 | 26.0637313272 | 14.0817068494 |
| C | 20.4439125257 | 22.8773993490 | 23.7328348396 |
| H | 19.7850853044 | 23.2281713139 | 22.9253238578 |
| H | 20.4325504037 | 23.5899624811 | 24.5701940063 |
| H | 21.4753806168 | 22.7830024686 | 23.3617942124 |
| C | 19.1582983984 | 19.2660136508 | 26.8631225546 |
| H | 19.1190189537 | 20.0066412716 | 27.6755096281 |
| H | 18.2010764366 | 18.7294022977 | 26.7935669785 |
| H | 19.9729943271 | 18.5551127299 | 27.0648977073 |
| C | 15.4560140347 | 9.4341481686  | 23.1795816023 |
| H | 14.9670008775 | 10.3960464474 | 23.3932087584 |
| H | 14.8833553437 | 8.6281745895  | 23.6617180079 |
| H | 16.4883488973 | 9.4446312654  | 23.5574538294 |
